# Supplementary material for: Factors affecting the healthcare utilization from Shasthyo Suroksha Karmasuchi scheme among the below-poverty-line population in one subdistrict in Bangladesh: a cross sectional study
Source: PubMed Central journal article supplement (PMC9270808; doi:10.1186/s12913-022-08254-1), 2022-07-08
Supplement: 12913_2022_8254_MOESM1_ESM.pdf [file 12913_2022_8254_MOESM1_ESM.pdf]

**Section 2: Information on household members**

| C1          | C2                 | C3                                   | C4                                  | C5     | C6     | C7              | C8             | C9                    | C10             | C11                |    |                                                                 |                                                     |                                        |
|-------------|--------------------|--------------------------------------|-------------------------------------|--------|--------|-----------------|----------------|-----------------------|-----------------|--------------------|----|-----------------------------------------------------------------|-----------------------------------------------------|----------------------------------------|
| Member code | Name<br>Short name | Relationship with the household head |                                     | Gender |        | Age-in integers | Marital status |                       | Main occupation |                    |    | Does this member earn regularly? Yes 1 No 2 [Not-applicable 99] | How many days the member worked in the last 30 days | Earnings of the last 30 days [In taka] |
|             |                    | 1                                    | 2                                   | 1      | 2      |                 | 1              | 2                     | 1               | 2                  | 3  |                                                                 |                                                     |                                        |
|             |                    | 1                                    | Self                                | 1      | Male   |                 | 1              | Married               | 1               | Agriculture        | 16 | Worker                                                          |                                                     |                                        |
|             |                    | 2                                    | Husband/wife                        | 2      | Female |                 | 2              | Single                | 2               | Housewife          | 17 | Fisherman/oarsman/Fish farming                                  |                                                     |                                        |
|             |                    | 3                                    | Father/Mother                       |        |        |                 | 3              | Divoreced/divorcee    | 3               | Daylaborer         | 18 | Handycraft                                                      |                                                     |                                        |
|             |                    | 4                                    | Son/daughter                        |        |        |                 | 4              | Separated             | 4               | Rishkaw/Van driver | 19 | Garments worker                                                 |                                                     |                                        |
|             |                    | 5                                    | Father-in-law / mother-in-law       |        |        |                 | 5              | Destitute             | 5               | CNG/Auto driver    | 20 | Reastauratn/worker                                              |                                                     |                                        |
|             |                    | 6                                    | Brother/Sister                      |        |        |                 | 6              | Others-Please specify | 6               | Maid               | 21 | Mechanics                                                       |                                                     |                                        |
|             |                    | 7                                    | Son-in-law / daughter-in-law        |        |        |                 |                |                       | 7               | Fromal Job         | 22 | Salesman                                                        |                                                     |                                        |
|             |                    | 8                                    | Grandson/Grand- daughter            |        |        |                 |                |                       | 8               | Shopkeeper         | 23 | Barber                                                          |                                                     |                                        |
|             |                    | 9                                    | Relatives                           |        |        |                 |                |                       | 9               | Begger             | 24 | Tailor                                                          |                                                     |                                        |
|             |                    | 10                                   | Adopted children                    |        |        |                 |                |                       | 10              | Unemployed         | 25 | Teacher                                                         |                                                     |                                        |
|             |                    | 11                                   | Uncle/aunt                          |        |        |                 |                |                       | 11              | Student            | 26 | Mobile business                                                 |                                                     |                                        |
|             |                    | 12                                   | Grandfather/grandmother             |        |        |                 |                |                       | 12              | old                | 27 | Not applicable                                                  |                                                     |                                        |
|             |                    | 13                                   | Relation with who are not relatives |        |        |                 |                |                       | 13              | Child              | 28 | Disabled                                                        |                                                     |                                        |
|             |                    | 14                                   | Others Specify                      |        |        |                 |                |                       | 14              | Farming            | 29 | Others-specify                                                  |                                                     |                                        |
|             |                    |                                      |                                     |        |        |                 |                |                       | 15              | Sharecropping      |    |                                                                 |                                                     |                                        |
|             |                    |                                      |                                     |        |        |                 |                |                       |                 |                    |    |                                                                 |                                                     |                                        |
|             |                    |                                      |                                     |        |        |                 |                |                       |                 |                    |    |                                                                 |                                                     |                                        |
|             |                    |                                      |                                     |        |        |                 |                |                       |                 |                    |    |                                                                 |                                                     |                                        |
|             |                    |                                      |                                     |        |        |                 |                |                       |                 |                    |    |                                                                 |                                                     |                                        |
|             |                    |                                      |                                     |        |        |                 |                |                       |                 |                    |    |                                                                 |                                                     |                                        |
|             |                    |                                      |                                     |        |        |                 |                |                       |                 |                    |    |                                                                 |                                                     |                                        |
|             |                    |                                      |                                     |        |        |                 |                |                       |                 |                    |    |                                                                 |                                                     |                                        |
|             |                    |                                      |                                     |        |        |                 |                |                       |                 |                    |    |                                                                 |                                                     |                                        |
|             |                    |                                      |                                     |        |        |                 |                |                       |                 |                    |    |                                                                 |                                                     |                                        |
|             |                    |                                      |                                     |        |        |                 |                |                       |                 |                    |    |                                                                 |                                                     |                                        |

### Section 3: Information on household

#### Part 3A: Living place and land related information

| 1         | Are you the owner of the homestead you used to live?                                        | 1. Yes → go question no 3                                                                                                                                                                                                                                                                                                                                                                                                                                                                                                                                                                                                                                                                                                                                                                                                                                                                                                                                                                                                                                                                                                                                                                                                                                                                                                                                                                                                                                                                                                                                                                                                                                                                                                                                 | 2. No                                                                                                                                                                                                                                        |                |     |      |      |            |           |   |    |                              |   |   |    |                  |   |   |    |                       |   |   |    |                         |   |   |    |                             |   |   |    |      |   |   |    |     |   |   |    |         |   |   |     |       |   |   |     |           |   |   |     |              |   |   |     |              |   |   |     |                   |   |   |     |          |   |   |     |            |   |   |     |                     |   |   |     |                  |   |   |     |                         |   |   |     |         |   |   |     |            |   |   |     |        |   |   |     |     |   |   |     |                |   |   |     |                     |   |   |  |  |
|-----------|---------------------------------------------------------------------------------------------|-----------------------------------------------------------------------------------------------------------------------------------------------------------------------------------------------------------------------------------------------------------------------------------------------------------------------------------------------------------------------------------------------------------------------------------------------------------------------------------------------------------------------------------------------------------------------------------------------------------------------------------------------------------------------------------------------------------------------------------------------------------------------------------------------------------------------------------------------------------------------------------------------------------------------------------------------------------------------------------------------------------------------------------------------------------------------------------------------------------------------------------------------------------------------------------------------------------------------------------------------------------------------------------------------------------------------------------------------------------------------------------------------------------------------------------------------------------------------------------------------------------------------------------------------------------------------------------------------------------------------------------------------------------------------------------------------------------------------------------------------------------|----------------------------------------------------------------------------------------------------------------------------------------------------------------------------------------------------------------------------------------------|----------------|-----|------|------|------------|-----------|---|----|------------------------------|---|---|----|------------------|---|---|----|-----------------------|---|---|----|-------------------------|---|---|----|-----------------------------|---|---|----|------|---|---|----|-----|---|---|----|---------|---|---|-----|-------|---|---|-----|-----------|---|---|-----|--------------|---|---|-----|--------------|---|---|-----|-------------------|---|---|-----|----------|---|---|-----|------------|---|---|-----|---------------------|---|---|-----|------------------|---|---|-----|-------------------------|---|---|-----|---------|---|---|-----|------------|---|---|-----|--------|---|---|-----|-----|---|---|-----|----------------|---|---|-----|---------------------|---|---|--|--|
| 2         | Who is the owner of the homestead?                                                          | 1. Others land<br>2. Roadside/govt. land<br>3. Rented<br>(Please mention the area if it is rented) ----sq.ft                                                                                                                                                                                                                                                                                                                                                                                                                                                                                                                                                                                                                                                                                                                                                                                                                                                                                                                                                                                                                                                                                                                                                                                                                                                                                                                                                                                                                                                                                                                                                                                                                                              |                                                                                                                                                                                                                                              |                |     |      |      |            |           |   |    |                              |   |   |    |                  |   |   |    |                       |   |   |    |                         |   |   |    |                             |   |   |    |      |   |   |    |     |   |   |    |         |   |   |     |       |   |   |     |           |   |   |     |              |   |   |     |              |   |   |     |                   |   |   |     |          |   |   |     |            |   |   |     |                     |   |   |     |                  |   |   |     |                         |   |   |     |         |   |   |     |            |   |   |     |        |   |   |     |     |   |   |     |                |   |   |     |                     |   |   |  |  |
| 3         | How was the living condition of the household? According to the interviewer                 | 1. Clean<br>2. Average<br>3. Dirty<br>4. Very dirty                                                                                                                                                                                                                                                                                                                                                                                                                                                                                                                                                                                                                                                                                                                                                                                                                                                                                                                                                                                                                                                                                                                                                                                                                                                                                                                                                                                                                                                                                                                                                                                                                                                                                                       |                                                                                                                                                                                                                                              |                |     |      |      |            |           |   |    |                              |   |   |    |                  |   |   |    |                       |   |   |    |                         |   |   |    |                             |   |   |    |      |   |   |    |     |   |   |    |         |   |   |     |       |   |   |     |           |   |   |     |              |   |   |     |              |   |   |     |                   |   |   |     |          |   |   |     |            |   |   |     |                     |   |   |     |                  |   |   |     |                         |   |   |     |         |   |   |     |            |   |   |     |        |   |   |     |     |   |   |     |                |   |   |     |                     |   |   |  |  |
| 4         | Do you have any other land except the homestead?                                            | 1. Yes                                                                                                                                                                                                                                                                                                                                                                                                                                                                                                                                                                                                                                                                                                                                                                                                                                                                                                                                                                                                                                                                                                                                                                                                                                                                                                                                                                                                                                                                                                                                                                                                                                                                                                                                                    | 2. No                                                                                                                                                                                                                                        |                |     |      |      |            |           |   |    |                              |   |   |    |                  |   |   |    |                       |   |   |    |                         |   |   |    |                             |   |   |    |      |   |   |    |     |   |   |    |         |   |   |     |       |   |   |     |           |   |   |     |              |   |   |     |              |   |   |     |                   |   |   |     |          |   |   |     |            |   |   |     |                     |   |   |     |                  |   |   |     |                         |   |   |     |         |   |   |     |            |   |   |     |        |   |   |     |     |   |   |     |                |   |   |     |                     |   |   |  |  |
| 5         | Write the amount of land/homestead area                                                     | Homestead with pond and pool area:<br>Paki : _____ Decimal: _____ = Decimal _ _ _ _ _ _ _ <br>Agricultural land<br>Paki: _____ Decimal: _____ = Decimal _ _ _ _ _ _ _                                                                                                                                                                                                                                                                                                                                                                                                                                                                                                                                                                                                                                                                                                                                                                                                                                                                                                                                                                                                                                                                                                                                                                                                                                                                                                                                                                                                                                                                                                                                                                                     |                                                                                                                                                                                                                                              |                |     |      |      |            |           |   |    |                              |   |   |    |                  |   |   |    |                       |   |   |    |                         |   |   |    |                             |   |   |    |      |   |   |    |     |   |   |    |         |   |   |     |       |   |   |     |           |   |   |     |              |   |   |     |              |   |   |     |                   |   |   |     |          |   |   |     |            |   |   |     |                     |   |   |     |                  |   |   |     |                         |   |   |     |         |   |   |     |            |   |   |     |        |   |   |     |     |   |   |     |                |   |   |     |                     |   |   |  |  |
| 6         | How many rooms are there in this household?                                                 | Number  _ _                                                                                                                                                                                                                                                                                                                                                                                                                                                                                                                                                                                                                                                                                                                                                                                                                                                                                                                                                                                                                                                                                                                                                                                                                                                                                                                                                                                                                                                                                                                                                                                                                                                                                                                                               |                                                                                                                                                                                                                                              |                |     |      |      |            |           |   |    |                              |   |   |    |                  |   |   |    |                       |   |   |    |                         |   |   |    |                             |   |   |    |      |   |   |    |     |   |   |    |         |   |   |     |       |   |   |     |           |   |   |     |              |   |   |     |              |   |   |     |                   |   |   |     |          |   |   |     |            |   |   |     |                     |   |   |     |                  |   |   |     |                         |   |   |     |         |   |   |     |            |   |   |     |        |   |   |     |     |   |   |     |                |   |   |     |                     |   |   |  |  |
| 7         | What kind of materials was used to make the main room of the household to be verified?      | 1. Pucca / semi-Pucca<br>2. Tin<br>3. Tin and bamboo<br>4. Tin and others<br>5. Bamboo and others<br>6. Soil<br>7. wood<br>8. ceramics/ tiles<br>9. Others                                                                                                                                                                                                                                                                                                                                                                                                                                                                                                                                                                                                                                                                                                                                                                                                                                                                                                                                                                                                                                                                                                                                                                                                                                                                                                                                                                                                                                                                                                                                                                                                | <table border="1"> <thead> <tr> <th></th> <th>Roof</th> <th>Wall</th> <th>Floor</th> </tr> </thead> <tbody> <tr> <td>Serial no</td> <td></td> <td></td> <td></td> </tr> <tr> <td></td> <td></td> <td></td> <td></td> </tr> </tbody> </table> |                |     | Roof | Wall | Floor      | Serial no |   |    |                              |   |   |    |                  |   |   |    |                       |   |   |    |                         |   |   |    |                             |   |   |    |      |   |   |    |     |   |   |    |         |   |   |     |       |   |   |     |           |   |   |     |              |   |   |     |              |   |   |     |                   |   |   |     |          |   |   |     |            |   |   |     |                     |   |   |     |                  |   |   |     |                         |   |   |     |         |   |   |     |            |   |   |     |        |   |   |     |     |   |   |     |                |   |   |     |                     |   |   |  |  |
|           | Roof                                                                                        | Wall                                                                                                                                                                                                                                                                                                                                                                                                                                                                                                                                                                                                                                                                                                                                                                                                                                                                                                                                                                                                                                                                                                                                                                                                                                                                                                                                                                                                                                                                                                                                                                                                                                                                                                                                                      | Floor                                                                                                                                                                                                                                        |                |     |      |      |            |           |   |    |                              |   |   |    |                  |   |   |    |                       |   |   |    |                         |   |   |    |                             |   |   |    |      |   |   |    |     |   |   |    |         |   |   |     |       |   |   |     |           |   |   |     |              |   |   |     |              |   |   |     |                   |   |   |     |          |   |   |     |            |   |   |     |                     |   |   |     |                  |   |   |     |                         |   |   |     |         |   |   |     |            |   |   |     |        |   |   |     |     |   |   |     |                |   |   |     |                     |   |   |  |  |
| Serial no |                                                                                             |                                                                                                                                                                                                                                                                                                                                                                                                                                                                                                                                                                                                                                                                                                                                                                                                                                                                                                                                                                                                                                                                                                                                                                                                                                                                                                                                                                                                                                                                                                                                                                                                                                                                                                                                                           |                                                                                                                                                                                                                                              |                |     |      |      |            |           |   |    |                              |   |   |    |                  |   |   |    |                       |   |   |    |                         |   |   |    |                             |   |   |    |      |   |   |    |     |   |   |    |         |   |   |     |       |   |   |     |           |   |   |     |              |   |   |     |              |   |   |     |                   |   |   |     |          |   |   |     |            |   |   |     |                     |   |   |     |                  |   |   |     |                         |   |   |     |         |   |   |     |            |   |   |     |        |   |   |     |     |   |   |     |                |   |   |     |                     |   |   |  |  |
|           |                                                                                             |                                                                                                                                                                                                                                                                                                                                                                                                                                                                                                                                                                                                                                                                                                                                                                                                                                                                                                                                                                                                                                                                                                                                                                                                                                                                                                                                                                                                                                                                                                                                                                                                                                                                                                                                                           |                                                                                                                                                                                                                                              |                |     |      |      |            |           |   |    |                              |   |   |    |                  |   |   |    |                       |   |   |    |                         |   |   |    |                             |   |   |    |      |   |   |    |     |   |   |    |         |   |   |     |       |   |   |     |           |   |   |     |              |   |   |     |              |   |   |     |                   |   |   |     |          |   |   |     |            |   |   |     |                     |   |   |     |                  |   |   |     |                         |   |   |     |         |   |   |     |            |   |   |     |        |   |   |     |     |   |   |     |                |   |   |     |                     |   |   |  |  |
| 8         | Are these goods / assets available at your household? (More than one answer is acceptable?) | <table border="1"> <thead> <tr> <th>No.</th> <th>goods / assets</th> <th>Yes</th> <th>No</th> </tr> </thead> <tbody> <tr><td>1.</td><td>Cow/goat</td><td>1</td><td>2</td></tr> <tr><td>2.</td><td>Fishing net</td><td>1</td><td>2</td></tr> <tr><td>3.</td><td>duck/Chicken</td><td>1</td><td>2</td></tr> <tr><td>4.</td><td>Grocery</td><td>1</td><td>2</td></tr> <tr><td>5.</td><td>Riksha/Van/ Auto Riksha</td><td>1</td><td>2</td></tr> <tr><td>6.</td><td>Agticultural instruments</td><td>1</td><td>2</td></tr> <tr><td>7.</td><td>Boat</td><td>1</td><td>2</td></tr> <tr><td>8.</td><td>Bed</td><td>1</td><td>2</td></tr> <tr><td>9.</td><td>blanket</td><td>1</td><td>2</td></tr> <tr><td>10.</td><td>Quilt</td><td>1</td><td>2</td></tr> <tr><td>11.</td><td>Hurricane</td><td>1</td><td>2</td></tr> <tr><td>12.</td><td>Chair/ Table</td><td>1</td><td>2</td></tr> <tr><td>13.</td><td>Dining Table</td><td>1</td><td>2</td></tr> <tr><td>14.</td><td>Amirah / Showcase</td><td>1</td><td>2</td></tr> <tr><td>15.</td><td>Sofa Set</td><td>1</td><td>2</td></tr> <tr><td>16.</td><td>Television</td><td>1</td><td>2</td></tr> <tr><td>17.</td><td>Radio/ Tap Recorder</td><td>1</td><td>2</td></tr> <tr><td>18.</td><td>Clock/wall clock</td><td>1</td><td>2</td></tr> <tr><td>19.</td><td>Telephone/ Mobile Phone</td><td>1</td><td>2</td></tr> <tr><td>20.</td><td>Bicycle</td><td>1</td><td>2</td></tr> <tr><td>21.</td><td>Motorcycle</td><td>1</td><td>2</td></tr> <tr><td>22.</td><td>Freeze</td><td>1</td><td>2</td></tr> <tr><td>23.</td><td>Fan</td><td>1</td><td>2</td></tr> <tr><td>24.</td><td>Sewing-machine</td><td>1</td><td>2</td></tr> <tr><td>25.</td><td>OthersSpecify _____</td><td>1</td><td>2</td></tr> </tbody> </table> | No.                                                                                                                                                                                                                                          | goods / assets | Yes | No   | 1.   | Cow/goat   | 1         | 2 | 2. | Fishing net                  | 1 | 2 | 3. | duck/Chicken     | 1 | 2 | 4. | Grocery               | 1 | 2 | 5. | Riksha/Van/ Auto Riksha | 1 | 2 | 6. | Agticultural instruments    | 1 | 2 | 7. | Boat | 1 | 2 | 8. | Bed | 1 | 2 | 9. | blanket | 1 | 2 | 10. | Quilt | 1 | 2 | 11. | Hurricane | 1 | 2 | 12. | Chair/ Table | 1 | 2 | 13. | Dining Table | 1 | 2 | 14. | Amirah / Showcase | 1 | 2 | 15. | Sofa Set | 1 | 2 | 16. | Television | 1 | 2 | 17. | Radio/ Tap Recorder | 1 | 2 | 18. | Clock/wall clock | 1 | 2 | 19. | Telephone/ Mobile Phone | 1 | 2 | 20. | Bicycle | 1 | 2 | 21. | Motorcycle | 1 | 2 | 22. | Freeze | 1 | 2 | 23. | Fan | 1 | 2 | 24. | Sewing-machine | 1 | 2 | 25. | OthersSpecify _____ | 1 | 2 |  |  |
| No.       | goods / assets                                                                              | Yes                                                                                                                                                                                                                                                                                                                                                                                                                                                                                                                                                                                                                                                                                                                                                                                                                                                                                                                                                                                                                                                                                                                                                                                                                                                                                                                                                                                                                                                                                                                                                                                                                                                                                                                                                       | No                                                                                                                                                                                                                                           |                |     |      |      |            |           |   |    |                              |   |   |    |                  |   |   |    |                       |   |   |    |                         |   |   |    |                             |   |   |    |      |   |   |    |     |   |   |    |         |   |   |     |       |   |   |     |           |   |   |     |              |   |   |     |              |   |   |     |                   |   |   |     |          |   |   |     |            |   |   |     |                     |   |   |     |                  |   |   |     |                         |   |   |     |         |   |   |     |            |   |   |     |        |   |   |     |     |   |   |     |                |   |   |     |                     |   |   |  |  |
| 1.        | Cow/goat                                                                                    | 1                                                                                                                                                                                                                                                                                                                                                                                                                                                                                                                                                                                                                                                                                                                                                                                                                                                                                                                                                                                                                                                                                                                                                                                                                                                                                                                                                                                                                                                                                                                                                                                                                                                                                                                                                         | 2                                                                                                                                                                                                                                            |                |     |      |      |            |           |   |    |                              |   |   |    |                  |   |   |    |                       |   |   |    |                         |   |   |    |                             |   |   |    |      |   |   |    |     |   |   |    |         |   |   |     |       |   |   |     |           |   |   |     |              |   |   |     |              |   |   |     |                   |   |   |     |          |   |   |     |            |   |   |     |                     |   |   |     |                  |   |   |     |                         |   |   |     |         |   |   |     |            |   |   |     |        |   |   |     |     |   |   |     |                |   |   |     |                     |   |   |  |  |
| 2.        | Fishing net                                                                                 | 1                                                                                                                                                                                                                                                                                                                                                                                                                                                                                                                                                                                                                                                                                                                                                                                                                                                                                                                                                                                                                                                                                                                                                                                                                                                                                                                                                                                                                                                                                                                                                                                                                                                                                                                                                         | 2                                                                                                                                                                                                                                            |                |     |      |      |            |           |   |    |                              |   |   |    |                  |   |   |    |                       |   |   |    |                         |   |   |    |                             |   |   |    |      |   |   |    |     |   |   |    |         |   |   |     |       |   |   |     |           |   |   |     |              |   |   |     |              |   |   |     |                   |   |   |     |          |   |   |     |            |   |   |     |                     |   |   |     |                  |   |   |     |                         |   |   |     |         |   |   |     |            |   |   |     |        |   |   |     |     |   |   |     |                |   |   |     |                     |   |   |  |  |
| 3.        | duck/Chicken                                                                                | 1                                                                                                                                                                                                                                                                                                                                                                                                                                                                                                                                                                                                                                                                                                                                                                                                                                                                                                                                                                                                                                                                                                                                                                                                                                                                                                                                                                                                                                                                                                                                                                                                                                                                                                                                                         | 2                                                                                                                                                                                                                                            |                |     |      |      |            |           |   |    |                              |   |   |    |                  |   |   |    |                       |   |   |    |                         |   |   |    |                             |   |   |    |      |   |   |    |     |   |   |    |         |   |   |     |       |   |   |     |           |   |   |     |              |   |   |     |              |   |   |     |                   |   |   |     |          |   |   |     |            |   |   |     |                     |   |   |     |                  |   |   |     |                         |   |   |     |         |   |   |     |            |   |   |     |        |   |   |     |     |   |   |     |                |   |   |     |                     |   |   |  |  |
| 4.        | Grocery                                                                                     | 1                                                                                                                                                                                                                                                                                                                                                                                                                                                                                                                                                                                                                                                                                                                                                                                                                                                                                                                                                                                                                                                                                                                                                                                                                                                                                                                                                                                                                                                                                                                                                                                                                                                                                                                                                         | 2                                                                                                                                                                                                                                            |                |     |      |      |            |           |   |    |                              |   |   |    |                  |   |   |    |                       |   |   |    |                         |   |   |    |                             |   |   |    |      |   |   |    |     |   |   |    |         |   |   |     |       |   |   |     |           |   |   |     |              |   |   |     |              |   |   |     |                   |   |   |     |          |   |   |     |            |   |   |     |                     |   |   |     |                  |   |   |     |                         |   |   |     |         |   |   |     |            |   |   |     |        |   |   |     |     |   |   |     |                |   |   |     |                     |   |   |  |  |
| 5.        | Riksha/Van/ Auto Riksha                                                                     | 1                                                                                                                                                                                                                                                                                                                                                                                                                                                                                                                                                                                                                                                                                                                                                                                                                                                                                                                                                                                                                                                                                                                                                                                                                                                                                                                                                                                                                                                                                                                                                                                                                                                                                                                                                         | 2                                                                                                                                                                                                                                            |                |     |      |      |            |           |   |    |                              |   |   |    |                  |   |   |    |                       |   |   |    |                         |   |   |    |                             |   |   |    |      |   |   |    |     |   |   |    |         |   |   |     |       |   |   |     |           |   |   |     |              |   |   |     |              |   |   |     |                   |   |   |     |          |   |   |     |            |   |   |     |                     |   |   |     |                  |   |   |     |                         |   |   |     |         |   |   |     |            |   |   |     |        |   |   |     |     |   |   |     |                |   |   |     |                     |   |   |  |  |
| 6.        | Agticultural instruments                                                                    | 1                                                                                                                                                                                                                                                                                                                                                                                                                                                                                                                                                                                                                                                                                                                                                                                                                                                                                                                                                                                                                                                                                                                                                                                                                                                                                                                                                                                                                                                                                                                                                                                                                                                                                                                                                         | 2                                                                                                                                                                                                                                            |                |     |      |      |            |           |   |    |                              |   |   |    |                  |   |   |    |                       |   |   |    |                         |   |   |    |                             |   |   |    |      |   |   |    |     |   |   |    |         |   |   |     |       |   |   |     |           |   |   |     |              |   |   |     |              |   |   |     |                   |   |   |     |          |   |   |     |            |   |   |     |                     |   |   |     |                  |   |   |     |                         |   |   |     |         |   |   |     |            |   |   |     |        |   |   |     |     |   |   |     |                |   |   |     |                     |   |   |  |  |
| 7.        | Boat                                                                                        | 1                                                                                                                                                                                                                                                                                                                                                                                                                                                                                                                                                                                                                                                                                                                                                                                                                                                                                                                                                                                                                                                                                                                                                                                                                                                                                                                                                                                                                                                                                                                                                                                                                                                                                                                                                         | 2                                                                                                                                                                                                                                            |                |     |      |      |            |           |   |    |                              |   |   |    |                  |   |   |    |                       |   |   |    |                         |   |   |    |                             |   |   |    |      |   |   |    |     |   |   |    |         |   |   |     |       |   |   |     |           |   |   |     |              |   |   |     |              |   |   |     |                   |   |   |     |          |   |   |     |            |   |   |     |                     |   |   |     |                  |   |   |     |                         |   |   |     |         |   |   |     |            |   |   |     |        |   |   |     |     |   |   |     |                |   |   |     |                     |   |   |  |  |
| 8.        | Bed                                                                                         | 1                                                                                                                                                                                                                                                                                                                                                                                                                                                                                                                                                                                                                                                                                                                                                                                                                                                                                                                                                                                                                                                                                                                                                                                                                                                                                                                                                                                                                                                                                                                                                                                                                                                                                                                                                         | 2                                                                                                                                                                                                                                            |                |     |      |      |            |           |   |    |                              |   |   |    |                  |   |   |    |                       |   |   |    |                         |   |   |    |                             |   |   |    |      |   |   |    |     |   |   |    |         |   |   |     |       |   |   |     |           |   |   |     |              |   |   |     |              |   |   |     |                   |   |   |     |          |   |   |     |            |   |   |     |                     |   |   |     |                  |   |   |     |                         |   |   |     |         |   |   |     |            |   |   |     |        |   |   |     |     |   |   |     |                |   |   |     |                     |   |   |  |  |
| 9.        | blanket                                                                                     | 1                                                                                                                                                                                                                                                                                                                                                                                                                                                                                                                                                                                                                                                                                                                                                                                                                                                                                                                                                                                                                                                                                                                                                                                                                                                                                                                                                                                                                                                                                                                                                                                                                                                                                                                                                         | 2                                                                                                                                                                                                                                            |                |     |      |      |            |           |   |    |                              |   |   |    |                  |   |   |    |                       |   |   |    |                         |   |   |    |                             |   |   |    |      |   |   |    |     |   |   |    |         |   |   |     |       |   |   |     |           |   |   |     |              |   |   |     |              |   |   |     |                   |   |   |     |          |   |   |     |            |   |   |     |                     |   |   |     |                  |   |   |     |                         |   |   |     |         |   |   |     |            |   |   |     |        |   |   |     |     |   |   |     |                |   |   |     |                     |   |   |  |  |
| 10.       | Quilt                                                                                       | 1                                                                                                                                                                                                                                                                                                                                                                                                                                                                                                                                                                                                                                                                                                                                                                                                                                                                                                                                                                                                                                                                                                                                                                                                                                                                                                                                                                                                                                                                                                                                                                                                                                                                                                                                                         | 2                                                                                                                                                                                                                                            |                |     |      |      |            |           |   |    |                              |   |   |    |                  |   |   |    |                       |   |   |    |                         |   |   |    |                             |   |   |    |      |   |   |    |     |   |   |    |         |   |   |     |       |   |   |     |           |   |   |     |              |   |   |     |              |   |   |     |                   |   |   |     |          |   |   |     |            |   |   |     |                     |   |   |     |                  |   |   |     |                         |   |   |     |         |   |   |     |            |   |   |     |        |   |   |     |     |   |   |     |                |   |   |     |                     |   |   |  |  |
| 11.       | Hurricane                                                                                   | 1                                                                                                                                                                                                                                                                                                                                                                                                                                                                                                                                                                                                                                                                                                                                                                                                                                                                                                                                                                                                                                                                                                                                                                                                                                                                                                                                                                                                                                                                                                                                                                                                                                                                                                                                                         | 2                                                                                                                                                                                                                                            |                |     |      |      |            |           |   |    |                              |   |   |    |                  |   |   |    |                       |   |   |    |                         |   |   |    |                             |   |   |    |      |   |   |    |     |   |   |    |         |   |   |     |       |   |   |     |           |   |   |     |              |   |   |     |              |   |   |     |                   |   |   |     |          |   |   |     |            |   |   |     |                     |   |   |     |                  |   |   |     |                         |   |   |     |         |   |   |     |            |   |   |     |        |   |   |     |     |   |   |     |                |   |   |     |                     |   |   |  |  |
| 12.       | Chair/ Table                                                                                | 1                                                                                                                                                                                                                                                                                                                                                                                                                                                                                                                                                                                                                                                                                                                                                                                                                                                                                                                                                                                                                                                                                                                                                                                                                                                                                                                                                                                                                                                                                                                                                                                                                                                                                                                                                         | 2                                                                                                                                                                                                                                            |                |     |      |      |            |           |   |    |                              |   |   |    |                  |   |   |    |                       |   |   |    |                         |   |   |    |                             |   |   |    |      |   |   |    |     |   |   |    |         |   |   |     |       |   |   |     |           |   |   |     |              |   |   |     |              |   |   |     |                   |   |   |     |          |   |   |     |            |   |   |     |                     |   |   |     |                  |   |   |     |                         |   |   |     |         |   |   |     |            |   |   |     |        |   |   |     |     |   |   |     |                |   |   |     |                     |   |   |  |  |
| 13.       | Dining Table                                                                                | 1                                                                                                                                                                                                                                                                                                                                                                                                                                                                                                                                                                                                                                                                                                                                                                                                                                                                                                                                                                                                                                                                                                                                                                                                                                                                                                                                                                                                                                                                                                                                                                                                                                                                                                                                                         | 2                                                                                                                                                                                                                                            |                |     |      |      |            |           |   |    |                              |   |   |    |                  |   |   |    |                       |   |   |    |                         |   |   |    |                             |   |   |    |      |   |   |    |     |   |   |    |         |   |   |     |       |   |   |     |           |   |   |     |              |   |   |     |              |   |   |     |                   |   |   |     |          |   |   |     |            |   |   |     |                     |   |   |     |                  |   |   |     |                         |   |   |     |         |   |   |     |            |   |   |     |        |   |   |     |     |   |   |     |                |   |   |     |                     |   |   |  |  |
| 14.       | Amirah / Showcase                                                                           | 1                                                                                                                                                                                                                                                                                                                                                                                                                                                                                                                                                                                                                                                                                                                                                                                                                                                                                                                                                                                                                                                                                                                                                                                                                                                                                                                                                                                                                                                                                                                                                                                                                                                                                                                                                         | 2                                                                                                                                                                                                                                            |                |     |      |      |            |           |   |    |                              |   |   |    |                  |   |   |    |                       |   |   |    |                         |   |   |    |                             |   |   |    |      |   |   |    |     |   |   |    |         |   |   |     |       |   |   |     |           |   |   |     |              |   |   |     |              |   |   |     |                   |   |   |     |          |   |   |     |            |   |   |     |                     |   |   |     |                  |   |   |     |                         |   |   |     |         |   |   |     |            |   |   |     |        |   |   |     |     |   |   |     |                |   |   |     |                     |   |   |  |  |
| 15.       | Sofa Set                                                                                    | 1                                                                                                                                                                                                                                                                                                                                                                                                                                                                                                                                                                                                                                                                                                                                                                                                                                                                                                                                                                                                                                                                                                                                                                                                                                                                                                                                                                                                                                                                                                                                                                                                                                                                                                                                                         | 2                                                                                                                                                                                                                                            |                |     |      |      |            |           |   |    |                              |   |   |    |                  |   |   |    |                       |   |   |    |                         |   |   |    |                             |   |   |    |      |   |   |    |     |   |   |    |         |   |   |     |       |   |   |     |           |   |   |     |              |   |   |     |              |   |   |     |                   |   |   |     |          |   |   |     |            |   |   |     |                     |   |   |     |                  |   |   |     |                         |   |   |     |         |   |   |     |            |   |   |     |        |   |   |     |     |   |   |     |                |   |   |     |                     |   |   |  |  |
| 16.       | Television                                                                                  | 1                                                                                                                                                                                                                                                                                                                                                                                                                                                                                                                                                                                                                                                                                                                                                                                                                                                                                                                                                                                                                                                                                                                                                                                                                                                                                                                                                                                                                                                                                                                                                                                                                                                                                                                                                         | 2                                                                                                                                                                                                                                            |                |     |      |      |            |           |   |    |                              |   |   |    |                  |   |   |    |                       |   |   |    |                         |   |   |    |                             |   |   |    |      |   |   |    |     |   |   |    |         |   |   |     |       |   |   |     |           |   |   |     |              |   |   |     |              |   |   |     |                   |   |   |     |          |   |   |     |            |   |   |     |                     |   |   |     |                  |   |   |     |                         |   |   |     |         |   |   |     |            |   |   |     |        |   |   |     |     |   |   |     |                |   |   |     |                     |   |   |  |  |
| 17.       | Radio/ Tap Recorder                                                                         | 1                                                                                                                                                                                                                                                                                                                                                                                                                                                                                                                                                                                                                                                                                                                                                                                                                                                                                                                                                                                                                                                                                                                                                                                                                                                                                                                                                                                                                                                                                                                                                                                                                                                                                                                                                         | 2                                                                                                                                                                                                                                            |                |     |      |      |            |           |   |    |                              |   |   |    |                  |   |   |    |                       |   |   |    |                         |   |   |    |                             |   |   |    |      |   |   |    |     |   |   |    |         |   |   |     |       |   |   |     |           |   |   |     |              |   |   |     |              |   |   |     |                   |   |   |     |          |   |   |     |            |   |   |     |                     |   |   |     |                  |   |   |     |                         |   |   |     |         |   |   |     |            |   |   |     |        |   |   |     |     |   |   |     |                |   |   |     |                     |   |   |  |  |
| 18.       | Clock/wall clock                                                                            | 1                                                                                                                                                                                                                                                                                                                                                                                                                                                                                                                                                                                                                                                                                                                                                                                                                                                                                                                                                                                                                                                                                                                                                                                                                                                                                                                                                                                                                                                                                                                                                                                                                                                                                                                                                         | 2                                                                                                                                                                                                                                            |                |     |      |      |            |           |   |    |                              |   |   |    |                  |   |   |    |                       |   |   |    |                         |   |   |    |                             |   |   |    |      |   |   |    |     |   |   |    |         |   |   |     |       |   |   |     |           |   |   |     |              |   |   |     |              |   |   |     |                   |   |   |     |          |   |   |     |            |   |   |     |                     |   |   |     |                  |   |   |     |                         |   |   |     |         |   |   |     |            |   |   |     |        |   |   |     |     |   |   |     |                |   |   |     |                     |   |   |  |  |
| 19.       | Telephone/ Mobile Phone                                                                     | 1                                                                                                                                                                                                                                                                                                                                                                                                                                                                                                                                                                                                                                                                                                                                                                                                                                                                                                                                                                                                                                                                                                                                                                                                                                                                                                                                                                                                                                                                                                                                                                                                                                                                                                                                                         | 2                                                                                                                                                                                                                                            |                |     |      |      |            |           |   |    |                              |   |   |    |                  |   |   |    |                       |   |   |    |                         |   |   |    |                             |   |   |    |      |   |   |    |     |   |   |    |         |   |   |     |       |   |   |     |           |   |   |     |              |   |   |     |              |   |   |     |                   |   |   |     |          |   |   |     |            |   |   |     |                     |   |   |     |                  |   |   |     |                         |   |   |     |         |   |   |     |            |   |   |     |        |   |   |     |     |   |   |     |                |   |   |     |                     |   |   |  |  |
| 20.       | Bicycle                                                                                     | 1                                                                                                                                                                                                                                                                                                                                                                                                                                                                                                                                                                                                                                                                                                                                                                                                                                                                                                                                                                                                                                                                                                                                                                                                                                                                                                                                                                                                                                                                                                                                                                                                                                                                                                                                                         | 2                                                                                                                                                                                                                                            |                |     |      |      |            |           |   |    |                              |   |   |    |                  |   |   |    |                       |   |   |    |                         |   |   |    |                             |   |   |    |      |   |   |    |     |   |   |    |         |   |   |     |       |   |   |     |           |   |   |     |              |   |   |     |              |   |   |     |                   |   |   |     |          |   |   |     |            |   |   |     |                     |   |   |     |                  |   |   |     |                         |   |   |     |         |   |   |     |            |   |   |     |        |   |   |     |     |   |   |     |                |   |   |     |                     |   |   |  |  |
| 21.       | Motorcycle                                                                                  | 1                                                                                                                                                                                                                                                                                                                                                                                                                                                                                                                                                                                                                                                                                                                                                                                                                                                                                                                                                                                                                                                                                                                                                                                                                                                                                                                                                                                                                                                                                                                                                                                                                                                                                                                                                         | 2                                                                                                                                                                                                                                            |                |     |      |      |            |           |   |    |                              |   |   |    |                  |   |   |    |                       |   |   |    |                         |   |   |    |                             |   |   |    |      |   |   |    |     |   |   |    |         |   |   |     |       |   |   |     |           |   |   |     |              |   |   |     |              |   |   |     |                   |   |   |     |          |   |   |     |            |   |   |     |                     |   |   |     |                  |   |   |     |                         |   |   |     |         |   |   |     |            |   |   |     |        |   |   |     |     |   |   |     |                |   |   |     |                     |   |   |  |  |
| 22.       | Freeze                                                                                      | 1                                                                                                                                                                                                                                                                                                                                                                                                                                                                                                                                                                                                                                                                                                                                                                                                                                                                                                                                                                                                                                                                                                                                                                                                                                                                                                                                                                                                                                                                                                                                                                                                                                                                                                                                                         | 2                                                                                                                                                                                                                                            |                |     |      |      |            |           |   |    |                              |   |   |    |                  |   |   |    |                       |   |   |    |                         |   |   |    |                             |   |   |    |      |   |   |    |     |   |   |    |         |   |   |     |       |   |   |     |           |   |   |     |              |   |   |     |              |   |   |     |                   |   |   |     |          |   |   |     |            |   |   |     |                     |   |   |     |                  |   |   |     |                         |   |   |     |         |   |   |     |            |   |   |     |        |   |   |     |     |   |   |     |                |   |   |     |                     |   |   |  |  |
| 23.       | Fan                                                                                         | 1                                                                                                                                                                                                                                                                                                                                                                                                                                                                                                                                                                                                                                                                                                                                                                                                                                                                                                                                                                                                                                                                                                                                                                                                                                                                                                                                                                                                                                                                                                                                                                                                                                                                                                                                                         | 2                                                                                                                                                                                                                                            |                |     |      |      |            |           |   |    |                              |   |   |    |                  |   |   |    |                       |   |   |    |                         |   |   |    |                             |   |   |    |      |   |   |    |     |   |   |    |         |   |   |     |       |   |   |     |           |   |   |     |              |   |   |     |              |   |   |     |                   |   |   |     |          |   |   |     |            |   |   |     |                     |   |   |     |                  |   |   |     |                         |   |   |     |         |   |   |     |            |   |   |     |        |   |   |     |     |   |   |     |                |   |   |     |                     |   |   |  |  |
| 24.       | Sewing-machine                                                                              | 1                                                                                                                                                                                                                                                                                                                                                                                                                                                                                                                                                                                                                                                                                                                                                                                                                                                                                                                                                                                                                                                                                                                                                                                                                                                                                                                                                                                                                                                                                                                                                                                                                                                                                                                                                         | 2                                                                                                                                                                                                                                            |                |     |      |      |            |           |   |    |                              |   |   |    |                  |   |   |    |                       |   |   |    |                         |   |   |    |                             |   |   |    |      |   |   |    |     |   |   |    |         |   |   |     |       |   |   |     |           |   |   |     |              |   |   |     |              |   |   |     |                   |   |   |     |          |   |   |     |            |   |   |     |                     |   |   |     |                  |   |   |     |                         |   |   |     |         |   |   |     |            |   |   |     |        |   |   |     |     |   |   |     |                |   |   |     |                     |   |   |  |  |
| 25.       | OthersSpecify _____                                                                         | 1                                                                                                                                                                                                                                                                                                                                                                                                                                                                                                                                                                                                                                                                                                                                                                                                                                                                                                                                                                                                                                                                                                                                                                                                                                                                                                                                                                                                                                                                                                                                                                                                                                                                                                                                                         | 2                                                                                                                                                                                                                                            |                |     |      |      |            |           |   |    |                              |   |   |    |                  |   |   |    |                       |   |   |    |                         |   |   |    |                             |   |   |    |      |   |   |    |     |   |   |    |         |   |   |     |       |   |   |     |           |   |   |     |              |   |   |     |              |   |   |     |                   |   |   |     |          |   |   |     |            |   |   |     |                     |   |   |     |                  |   |   |     |                         |   |   |     |         |   |   |     |            |   |   |     |        |   |   |     |     |   |   |     |                |   |   |     |                     |   |   |  |  |
| 9         | Which type of toilet do you use?                                                            | <table border="1"> <thead> <tr> <th>No.</th> <th>Toilet type</th> <th>Yes</th> <th>No</th> </tr> </thead> <tbody> <tr><td>1</td><td>Pit Toilet</td><td>1</td><td>2</td></tr> <tr><td>2</td><td>Paka Toilet</td><td>1</td><td>2</td></tr> <tr><td>3</td><td>Soil made Toilet</td><td>1</td><td>2</td></tr> <tr><td>4</td><td>Sanitary</td><td>1</td><td>2</td></tr> <tr><td>5</td><td>Others Specify] _____</td><td>1</td><td>2</td></tr> </tbody> </table>                                                                                                                                                                                                                                                                                                                                                                                                                                                                                                                                                                                                                                                                                                                                                                                                                                                                                                                                                                                                                                                                                                                                                                                                                                                                                                | No.                                                                                                                                                                                                                                          | Toilet type    | Yes | No   | 1    | Pit Toilet | 1         | 2 | 2  | Paka Toilet                  | 1 | 2 | 3  | Soil made Toilet | 1 | 2 | 4  | Sanitary              | 1 | 2 | 5  | Others Specify] _____   | 1 | 2 |    |                             |   |   |    |      |   |   |    |     |   |   |    |         |   |   |     |       |   |   |     |           |   |   |     |              |   |   |     |              |   |   |     |                   |   |   |     |          |   |   |     |            |   |   |     |                     |   |   |     |                  |   |   |     |                         |   |   |     |         |   |   |     |            |   |   |     |        |   |   |     |     |   |   |     |                |   |   |     |                     |   |   |  |  |
| No.       | Toilet type                                                                                 | Yes                                                                                                                                                                                                                                                                                                                                                                                                                                                                                                                                                                                                                                                                                                                                                                                                                                                                                                                                                                                                                                                                                                                                                                                                                                                                                                                                                                                                                                                                                                                                                                                                                                                                                                                                                       | No                                                                                                                                                                                                                                           |                |     |      |      |            |           |   |    |                              |   |   |    |                  |   |   |    |                       |   |   |    |                         |   |   |    |                             |   |   |    |      |   |   |    |     |   |   |    |         |   |   |     |       |   |   |     |           |   |   |     |              |   |   |     |              |   |   |     |                   |   |   |     |          |   |   |     |            |   |   |     |                     |   |   |     |                  |   |   |     |                         |   |   |     |         |   |   |     |            |   |   |     |        |   |   |     |     |   |   |     |                |   |   |     |                     |   |   |  |  |
| 1         | Pit Toilet                                                                                  | 1                                                                                                                                                                                                                                                                                                                                                                                                                                                                                                                                                                                                                                                                                                                                                                                                                                                                                                                                                                                                                                                                                                                                                                                                                                                                                                                                                                                                                                                                                                                                                                                                                                                                                                                                                         | 2                                                                                                                                                                                                                                            |                |     |      |      |            |           |   |    |                              |   |   |    |                  |   |   |    |                       |   |   |    |                         |   |   |    |                             |   |   |    |      |   |   |    |     |   |   |    |         |   |   |     |       |   |   |     |           |   |   |     |              |   |   |     |              |   |   |     |                   |   |   |     |          |   |   |     |            |   |   |     |                     |   |   |     |                  |   |   |     |                         |   |   |     |         |   |   |     |            |   |   |     |        |   |   |     |     |   |   |     |                |   |   |     |                     |   |   |  |  |
| 2         | Paka Toilet                                                                                 | 1                                                                                                                                                                                                                                                                                                                                                                                                                                                                                                                                                                                                                                                                                                                                                                                                                                                                                                                                                                                                                                                                                                                                                                                                                                                                                                                                                                                                                                                                                                                                                                                                                                                                                                                                                         | 2                                                                                                                                                                                                                                            |                |     |      |      |            |           |   |    |                              |   |   |    |                  |   |   |    |                       |   |   |    |                         |   |   |    |                             |   |   |    |      |   |   |    |     |   |   |    |         |   |   |     |       |   |   |     |           |   |   |     |              |   |   |     |              |   |   |     |                   |   |   |     |          |   |   |     |            |   |   |     |                     |   |   |     |                  |   |   |     |                         |   |   |     |         |   |   |     |            |   |   |     |        |   |   |     |     |   |   |     |                |   |   |     |                     |   |   |  |  |
| 3         | Soil made Toilet                                                                            | 1                                                                                                                                                                                                                                                                                                                                                                                                                                                                                                                                                                                                                                                                                                                                                                                                                                                                                                                                                                                                                                                                                                                                                                                                                                                                                                                                                                                                                                                                                                                                                                                                                                                                                                                                                         | 2                                                                                                                                                                                                                                            |                |     |      |      |            |           |   |    |                              |   |   |    |                  |   |   |    |                       |   |   |    |                         |   |   |    |                             |   |   |    |      |   |   |    |     |   |   |    |         |   |   |     |       |   |   |     |           |   |   |     |              |   |   |     |              |   |   |     |                   |   |   |     |          |   |   |     |            |   |   |     |                     |   |   |     |                  |   |   |     |                         |   |   |     |         |   |   |     |            |   |   |     |        |   |   |     |     |   |   |     |                |   |   |     |                     |   |   |  |  |
| 4         | Sanitary                                                                                    | 1                                                                                                                                                                                                                                                                                                                                                                                                                                                                                                                                                                                                                                                                                                                                                                                                                                                                                                                                                                                                                                                                                                                                                                                                                                                                                                                                                                                                                                                                                                                                                                                                                                                                                                                                                         | 2                                                                                                                                                                                                                                            |                |     |      |      |            |           |   |    |                              |   |   |    |                  |   |   |    |                       |   |   |    |                         |   |   |    |                             |   |   |    |      |   |   |    |     |   |   |    |         |   |   |     |       |   |   |     |           |   |   |     |              |   |   |     |              |   |   |     |                   |   |   |     |          |   |   |     |            |   |   |     |                     |   |   |     |                  |   |   |     |                         |   |   |     |         |   |   |     |            |   |   |     |        |   |   |     |     |   |   |     |                |   |   |     |                     |   |   |  |  |
| 5         | Others Specify] _____                                                                       | 1                                                                                                                                                                                                                                                                                                                                                                                                                                                                                                                                                                                                                                                                                                                                                                                                                                                                                                                                                                                                                                                                                                                                                                                                                                                                                                                                                                                                                                                                                                                                                                                                                                                                                                                                                         | 2                                                                                                                                                                                                                                            |                |     |      |      |            |           |   |    |                              |   |   |    |                  |   |   |    |                       |   |   |    |                         |   |   |    |                             |   |   |    |      |   |   |    |     |   |   |    |         |   |   |     |       |   |   |     |           |   |   |     |              |   |   |     |              |   |   |     |                   |   |   |     |          |   |   |     |            |   |   |     |                     |   |   |     |                  |   |   |     |                         |   |   |     |         |   |   |     |            |   |   |     |        |   |   |     |     |   |   |     |                |   |   |     |                     |   |   |  |  |
| 10        | What is the main source of drinking water?                                                  | <table border="1"> <thead> <tr> <th>No.</th> <th>Source type</th> <th>Yes</th> <th>No</th> </tr> </thead> <tbody> <tr><td>1</td><td>Tube well</td><td>1</td><td>2</td></tr> <tr><td>2</td><td>Ponds/rivers/puddles/streams</td><td>1</td><td>2</td></tr> <tr><td>3</td><td>Rain Water</td><td>1</td><td>2</td></tr> <tr><td>4</td><td>Pipe/tap/Supply Water</td><td>1</td><td>2</td></tr> <tr><td>5</td><td>Pure/filtered water</td><td>1</td><td>2</td></tr> <tr><td>6</td><td>Others please specify _____</td><td>1</td><td>2</td></tr> </tbody> </table>                                                                                                                                                                                                                                                                                                                                                                                                                                                                                                                                                                                                                                                                                                                                                                                                                                                                                                                                                                                                                                                                                                                                                                                               | No.                                                                                                                                                                                                                                          | Source type    | Yes | No   | 1    | Tube well  | 1         | 2 | 2  | Ponds/rivers/puddles/streams | 1 | 2 | 3  | Rain Water       | 1 | 2 | 4  | Pipe/tap/Supply Water | 1 | 2 | 5  | Pure/filtered water     | 1 | 2 | 6  | Others please specify _____ | 1 | 2 |    |      |   |   |    |     |   |   |    |         |   |   |     |       |   |   |     |           |   |   |     |              |   |   |     |              |   |   |     |                   |   |   |     |          |   |   |     |            |   |   |     |                     |   |   |     |                  |   |   |     |                         |   |   |     |         |   |   |     |            |   |   |     |        |   |   |     |     |   |   |     |                |   |   |     |                     |   |   |  |  |
| No.       | Source type                                                                                 | Yes                                                                                                                                                                                                                                                                                                                                                                                                                                                                                                                                                                                                                                                                                                                                                                                                                                                                                                                                                                                                                                                                                                                                                                                                                                                                                                                                                                                                                                                                                                                                                                                                                                                                                                                                                       | No                                                                                                                                                                                                                                           |                |     |      |      |            |           |   |    |                              |   |   |    |                  |   |   |    |                       |   |   |    |                         |   |   |    |                             |   |   |    |      |   |   |    |     |   |   |    |         |   |   |     |       |   |   |     |           |   |   |     |              |   |   |     |              |   |   |     |                   |   |   |     |          |   |   |     |            |   |   |     |                     |   |   |     |                  |   |   |     |                         |   |   |     |         |   |   |     |            |   |   |     |        |   |   |     |     |   |   |     |                |   |   |     |                     |   |   |  |  |
| 1         | Tube well                                                                                   | 1                                                                                                                                                                                                                                                                                                                                                                                                                                                                                                                                                                                                                                                                                                                                                                                                                                                                                                                                                                                                                                                                                                                                                                                                                                                                                                                                                                                                                                                                                                                                                                                                                                                                                                                                                         | 2                                                                                                                                                                                                                                            |                |     |      |      |            |           |   |    |                              |   |   |    |                  |   |   |    |                       |   |   |    |                         |   |   |    |                             |   |   |    |      |   |   |    |     |   |   |    |         |   |   |     |       |   |   |     |           |   |   |     |              |   |   |     |              |   |   |     |                   |   |   |     |          |   |   |     |            |   |   |     |                     |   |   |     |                  |   |   |     |                         |   |   |     |         |   |   |     |            |   |   |     |        |   |   |     |     |   |   |     |                |   |   |     |                     |   |   |  |  |
| 2         | Ponds/rivers/puddles/streams                                                                | 1                                                                                                                                                                                                                                                                                                                                                                                                                                                                                                                                                                                                                                                                                                                                                                                                                                                                                                                                                                                                                                                                                                                                                                                                                                                                                                                                                                                                                                                                                                                                                                                                                                                                                                                                                         | 2                                                                                                                                                                                                                                            |                |     |      |      |            |           |   |    |                              |   |   |    |                  |   |   |    |                       |   |   |    |                         |   |   |    |                             |   |   |    |      |   |   |    |     |   |   |    |         |   |   |     |       |   |   |     |           |   |   |     |              |   |   |     |              |   |   |     |                   |   |   |     |          |   |   |     |            |   |   |     |                     |   |   |     |                  |   |   |     |                         |   |   |     |         |   |   |     |            |   |   |     |        |   |   |     |     |   |   |     |                |   |   |     |                     |   |   |  |  |
| 3         | Rain Water                                                                                  | 1                                                                                                                                                                                                                                                                                                                                                                                                                                                                                                                                                                                                                                                                                                                                                                                                                                                                                                                                                                                                                                                                                                                                                                                                                                                                                                                                                                                                                                                                                                                                                                                                                                                                                                                                                         | 2                                                                                                                                                                                                                                            |                |     |      |      |            |           |   |    |                              |   |   |    |                  |   |   |    |                       |   |   |    |                         |   |   |    |                             |   |   |    |      |   |   |    |     |   |   |    |         |   |   |     |       |   |   |     |           |   |   |     |              |   |   |     |              |   |   |     |                   |   |   |     |          |   |   |     |            |   |   |     |                     |   |   |     |                  |   |   |     |                         |   |   |     |         |   |   |     |            |   |   |     |        |   |   |     |     |   |   |     |                |   |   |     |                     |   |   |  |  |
| 4         | Pipe/tap/Supply Water                                                                       | 1                                                                                                                                                                                                                                                                                                                                                                                                                                                                                                                                                                                                                                                                                                                                                                                                                                                                                                                                                                                                                                                                                                                                                                                                                                                                                                                                                                                                                                                                                                                                                                                                                                                                                                                                                         | 2                                                                                                                                                                                                                                            |                |     |      |      |            |           |   |    |                              |   |   |    |                  |   |   |    |                       |   |   |    |                         |   |   |    |                             |   |   |    |      |   |   |    |     |   |   |    |         |   |   |     |       |   |   |     |           |   |   |     |              |   |   |     |              |   |   |     |                   |   |   |     |          |   |   |     |            |   |   |     |                     |   |   |     |                  |   |   |     |                         |   |   |     |         |   |   |     |            |   |   |     |        |   |   |     |     |   |   |     |                |   |   |     |                     |   |   |  |  |
| 5         | Pure/filtered water                                                                         | 1                                                                                                                                                                                                                                                                                                                                                                                                                                                                                                                                                                                                                                                                                                                                                                                                                                                                                                                                                                                                                                                                                                                                                                                                                                                                                                                                                                                                                                                                                                                                                                                                                                                                                                                                                         | 2                                                                                                                                                                                                                                            |                |     |      |      |            |           |   |    |                              |   |   |    |                  |   |   |    |                       |   |   |    |                         |   |   |    |                             |   |   |    |      |   |   |    |     |   |   |    |         |   |   |     |       |   |   |     |           |   |   |     |              |   |   |     |              |   |   |     |                   |   |   |     |          |   |   |     |            |   |   |     |                     |   |   |     |                  |   |   |     |                         |   |   |     |         |   |   |     |            |   |   |     |        |   |   |     |     |   |   |     |                |   |   |     |                     |   |   |  |  |
| 6         | Others please specify _____                                                                 | 1                                                                                                                                                                                                                                                                                                                                                                                                                                                                                                                                                                                                                                                                                                                                                                                                                                                                                                                                                                                                                                                                                                                                                                                                                                                                                                                                                                                                                                                                                                                                                                                                                                                                                                                                                         | 2                                                                                                                                                                                                                                            |                |     |      |      |            |           |   |    |                              |   |   |    |                  |   |   |    |                       |   |   |    |                         |   |   |    |                             |   |   |    |      |   |   |    |     |   |   |    |         |   |   |     |       |   |   |     |           |   |   |     |              |   |   |     |              |   |   |     |                   |   |   |     |          |   |   |     |            |   |   |     |                     |   |   |     |                  |   |   |     |                         |   |   |     |         |   |   |     |            |   |   |     |        |   |   |     |     |   |   |     |                |   |   |     |                     |   |   |  |  |
| 11        | Do the household have Electricity?                                                          | 1. Yes                                                                                                                                                                                                                                                                                                                                                                                                                                                                                                                                                                                                                                                                                                                                                                                                                                                                                                                                                                                                                                                                                                                                                                                                                                                                                                                                                                                                                                                                                                                                                                                                                                                                                                                                                    | 2. No                                                                                                                                                                                                                                        |                |     |      |      |            |           |   |    |                              |   |   |    |                  |   |   |    |                       |   |   |    |                         |   |   |    |                             |   |   |    |      |   |   |    |     |   |   |    |         |   |   |     |       |   |   |     |           |   |   |     |              |   |   |     |              |   |   |     |                   |   |   |     |          |   |   |     |            |   |   |     |                     |   |   |     |                  |   |   |     |                         |   |   |     |         |   |   |     |            |   |   |     |        |   |   |     |     |   |   |     |                |   |   |     |                     |   |   |  |  |

| Part 3B: Other sources of household income |                                                                                                                                              |            |                           |                      |                                 |
|--------------------------------------------|----------------------------------------------------------------------------------------------------------------------------------------------|------------|---------------------------|----------------------|---------------------------------|
| 12                                         | Do the household have any permanent income source?                                                                                           | 1. Yes     | 2. No                     |                      |                                 |
| 14                                         | Do the household has any child labor?                                                                                                        | 1. Yes     | 2. No                     | Not applicable<br>99 |                                 |
| 15                                         | Section-2<br>In the last 12 months, what were the other sources of household irregular income? Exclude the items considered in the section-2 | <b>No.</b> | <b>Sources of income</b>  |                      | <b>Amount of income in Taka</b> |
|                                            |                                                                                                                                              | 1.         | Food for work             |                      |                                 |
|                                            |                                                                                                                                              | 2.         | Income from assets        |                      |                                 |
|                                            |                                                                                                                                              | 3.         | VGD/destitute allowance   |                      |                                 |
|                                            |                                                                                                                                              | 4.         | Old allowance             |                      |                                 |
|                                            |                                                                                                                                              | 5.         | Pension                   |                      |                                 |
|                                            |                                                                                                                                              | 6.         | Freedom fighter allowance |                      |                                 |
|                                            |                                                                                                                                              | 7.         | Remittance                |                      |                                 |
|                                            |                                                                                                                                              | 8.         | Stipend/scholarship       |                      |                                 |
|                                            |                                                                                                                                              | 9.         | Other allowances          |                      |                                 |
| 10.                                        | Others sources specify _____                                                                                                                 |            |                           |                      |                                 |

| Part 3C: Loan information of Household |                                                                     |                                                                                                                            |                                               |                                            |                                                                          |                             |                                |
|----------------------------------------|---------------------------------------------------------------------|----------------------------------------------------------------------------------------------------------------------------|-----------------------------------------------|--------------------------------------------|--------------------------------------------------------------------------|-----------------------------|--------------------------------|
| 16                                     | In the last 12 months, was any household member involved with loan? |                                                                                                                            | 1. Yes                                        | 2. No                                      |                                                                          | Code: 2                     |                                |
|                                        | If yes please fill-up the following section                         |                                                                                                                            |                                               |                                            |                                                                          |                             |                                |
|                                        | Member code                                                         | What is the source of loan?<br>1. Community scheme<br>2 Small lender organization<br>3 From Bank<br>4. Other Specify]..... | How much money did you loan in the last time? | What is the left-over amount of your loan? | Where did you invest the borrowed money during the last year?<br>Code: 2 | 1. Poultry farming          | 10. To buy fishing equipment   |
|                                        |                                                                     |                                                                                                                            |                                               |                                            |                                                                          | 2. Cow/goat farming         | 11. Buy boat                   |
|                                        |                                                                     |                                                                                                                            |                                               |                                            |                                                                          | 3. Handy crafting           | 12. Buy van /rickshaw          |
|                                        |                                                                     |                                                                                                                            |                                               |                                            |                                                                          | 4. Agriculture              | 13. Small business             |
|                                        |                                                                     |                                                                                                                            |                                               |                                            |                                                                          | 5. House building/repairing | 14. Business                   |
|                                        |                                                                     |                                                                                                                            |                                               |                                            |                                                                          | 6. Marriage                 | 15. Buy agricultural equipment |
|                                        |                                                                     |                                                                                                                            |                                               |                                            |                                                                          | 7. To buy consumption goods | 16. Pay the borrowed amount    |
|                                        |                                                                     |                                                                                                                            |                                               |                                            |                                                                          | 8. For educational expenses | 17. Sent abroad                |
|                                        |                                                                     |                                                                                                                            |                                               |                                            | 9. For treatment                                                         | 18. Others                  |                                |

| Part 3D: Household Food Security related information |                                                                                                                                                                     |                                                                                                                        |  |  |
|------------------------------------------------------|---------------------------------------------------------------------------------------------------------------------------------------------------------------------|------------------------------------------------------------------------------------------------------------------------|--|--|
| 18                                                   | How often did you eat three `square meals' full stomach meals a day in the past 12 months not a festival day?                                                       | 1 Mostly 3 meals each day<br>2. Sometimes 3 meals per day<br>3. Rarely 3 meals per day 1-6 times this year<br>4. Never |  |  |
| 19                                                   | In the last 12 months how often did you yourself skip entire meals because there was not enough food?                                                               | 1. Never<br>2. Rarely 1-6 times this year<br>3. Sometimes 7-12 times this year<br>4. Often few times each month        |  |  |
| 20                                                   | In the last 12 months how often did you personally eat less food in a meal because there was not enough food?                                                       | 1. Never<br>2. Rarely 1-6 times this year<br>3. Sometimes 7-12 times this year<br>4. Often few times each month        |  |  |
| 21                                                   | In the last 12 months, how often did you or any of your family have to eat wheat or another grain although you wanted to eat rice not including when you were sick? | 1. Never<br>2. Rarely 1-6 times this year<br>3. Sometimes 7-12 times this year<br>4. Often few times each month        |  |  |
| 22                                                   | In the past 12 months how often did your family have to ask food from relatives or neighbors to make a meal?                                                        | 1. Never<br>2. Rarely 1-6 times this year<br>3. Sometimes 7-12 times this year<br>4. Often few times each month        |  |  |
| 23                                                   | How many months you can live on from your land income?                                                                                                              | _____ Month                                                                                                            |  |  |

| Section 4: Household expenditure related information |                             |                                            |
|------------------------------------------------------|-----------------------------|--------------------------------------------|
| C1                                                   | C2                          | C3                                         |
| Sl. no                                               | Types of food               | Amount consumed If do not consumed put "0" |
| <b>Part A: Food Weekly expenditure</b>               |                             |                                            |
| <b>4.1 Rice crop consumed in the last week</b>       |                             |                                            |
| 1                                                    | Rice coarse (Kg)            |                                            |
| 2                                                    | Rice-plain (Kg)             |                                            |
| 3                                                    | Wheat (Kg)                  |                                            |
| 4                                                    | Flour (Kg)                  |                                            |
| 5                                                    | Flattened/Puffed rice ( Kg) |                                            |
| <b>4.2 Pulse crop consumed in the last week</b>      |                             |                                            |
| 1                                                    | Lentil (kg)                 |                                            |
| 2                                                    | Bengal gram pulses (Kg)     |                                            |
| 3                                                    | Mush Kalai (Kg)             |                                            |
| 4                                                    | Pea gram (Kg)               |                                            |
| 5                                                    | Chick ling-Vetch (Kg)       |                                            |
| 6                                                    | Green gram (Kg)             |                                            |
| 7                                                    | Anchor (Kg)                 |                                            |
| <b>4.3 cooking oil consumed in the last week</b>     |                             |                                            |
| 1                                                    | Soybean oil (liter)         |                                            |
| 2                                                    | Mustard oil (liter)         |                                            |

|                                                                   |                                     |                                              |
|-------------------------------------------------------------------|-------------------------------------|----------------------------------------------|
| 3                                                                 | Dalda (liter)                       |                                              |
| 4                                                                 | Ghee (Kg)                           |                                              |
| 5                                                                 | Palm Oil (litter)                   |                                              |
| 6                                                                 | Others Specify _____                |                                              |
| <b>4.4 leaf vegetables consumed in the last week</b>              |                                     |                                              |
| 1                                                                 | Amaranth (Kg/bundle)                |                                              |
| 2                                                                 | Malabar spinach (Kg/bundle)         |                                              |
| 3                                                                 | Spinach (Kg/bundle)                 |                                              |
| 4                                                                 | Spinach ipomoea aquatic (Kg/bundle) |                                              |
| 5                                                                 | Others leafy (Kg/bundle)            |                                              |
| 6                                                                 | Others leafy ( Kg/bundle )          |                                              |
| 7                                                                 | Others leafy ( Kg/bundle )          |                                              |
| 8                                                                 | Potato ( Kg )                       |                                              |
| 9                                                                 | Pointed gourd ( Kg )                |                                              |
| 10                                                                | Bitter melon ( Kg )                 |                                              |
| 11                                                                | Cauliflower ( Kg/piece )            |                                              |
| 12                                                                | Cabbage ( Kg/Piece )                |                                              |
| 13                                                                | Brinja (Kg)                         |                                              |
| 14                                                                | Arum (Kg)                           |                                              |
| 15                                                                | Gourd (Number)                      |                                              |
| 16                                                                | Tommato (Kg)                        |                                              |
| 17                                                                | Green papaya (Kg)                   |                                              |
| 18                                                                | Green Banana (Number)               |                                              |
| 19                                                                | Green Chili (Kg)                    |                                              |
| 20                                                                | Onion (Kg)                          |                                              |
| 21                                                                | Garlic (kg)                         |                                              |
| 22                                                                | Ginger (kg)                         |                                              |
| 23                                                                | _____Others vegetables (Kg)         |                                              |
| 24                                                                | _____Others vegetables (Kg)         |                                              |
| 25                                                                | _____Others vegetables (Kg)         |                                              |
| <b>Part B: Food Monthly consumption]</b>                          |                                     |                                              |
| <b>4.5 Spices consumption in the last month</b>                   |                                     |                                              |
| Sl. no                                                            | Types of food                       | Amount consumed (If do not consumed put "0") |
| C1                                                                | C2                                  | C3                                           |
| 1                                                                 | Dried chili ( gm )                  |                                              |
| 2                                                                 | Turmeric ( gm )                     |                                              |
| 3                                                                 | Cumin ( gm )                        |                                              |
| 4                                                                 | Cinnamon ( gm )                     |                                              |
| 5                                                                 | Cardamom ( gm )                     |                                              |
| 6                                                                 | Others spice _____ gm               |                                              |
| 7                                                                 | Others spice _____ gm               |                                              |
| 8                                                                 | Others spice _____ gm               |                                              |
| <b>4.6 Fish, meat, egg and milk consumption in the last month</b> |                                     |                                              |
| 1                                                                 | Large Fish (kg)                     |                                              |
| 2                                                                 | Smaller Fish kg]                    |                                              |
| 3                                                                 | Dried fish (kg)                     |                                              |
| 4                                                                 | Beef (kg)                           |                                              |
| 5                                                                 | Buffalo meat (Kg)                   |                                              |
| 6                                                                 | Local chicken meat (kg)             |                                              |
| 7                                                                 | Poultry chicken meat (Kg)           |                                              |
| 8                                                                 | [Duck meat (Kg)                     |                                              |
| 9                                                                 | Mutton (Kg)                         |                                              |
| 10                                                                | Egg (Number)                        |                                              |
| 11                                                                | Milk (Litter)                       |                                              |
| 12                                                                | Other protein items ___ (Kg)        |                                              |
| 13                                                                | Other protein items ___ (Kg)        |                                              |
| 14                                                                | Other protein items ___ Kg          |                                              |
| <b>4.7 [Fruits consumption in the last months]</b>                |                                     |                                              |
| 1                                                                 | Banana (Number)                     |                                              |
| 2                                                                 | Chinese (date)                      |                                              |
| 3                                                                 | Olive (Kg)                          |                                              |
| 4                                                                 | Papyaa (Kg)                         |                                              |
| 5                                                                 | Mango (Kg)                          |                                              |
| 6                                                                 | Jackfruit (Number)                  |                                              |
| 7                                                                 | Java Plum (Kg)                      |                                              |
| 8                                                                 | Apple (Kg)                          |                                              |
| 9                                                                 | Orange (Number)                     |                                              |
| 10                                                                | Graps (Kg)                          |                                              |

|    |                       |  |
|----|-----------------------|--|
| 11 | Guava (Kg)            |  |
| 12 | Pineapple (Number)    |  |
| 13 | Other fruits _____ Kg |  |
| 14 | Other fruits _____ Kg |  |
| 15 | Other fruits _____ Kg |  |

**4.8 Other foods in the last month**

|    |                       |  |
|----|-----------------------|--|
| 1  | Sugar (Kg)            |  |
| 2  | Jaggery (Kg)          |  |
| 3  | Milk powder (Kg)      |  |
| 4  | Salt (Kg)             |  |
| 5  | Noodles (Packate)     |  |
| 6  | Semolina (Kg)         |  |
| 7  | Cold drink (litter)   |  |
| 8  | Sweetned food         |  |
| 9  | _____ Child food (Kg) |  |
| 10 | Tea leaf (Kg)         |  |
| 11 | Biscut (Pack)         |  |
| 12 | Bombay mix (Packet)   |  |
| 13 | Others _____ Number   |  |
| 14 | Others _____ Number   |  |
| 15 | Others _____ Number   |  |

**Part C: Tobacco products Weekly expense**

**4.9 Tobacco intact in last week**

|    |                       |  |
|----|-----------------------|--|
| 1  | Batel leaf ( number ) |  |
| 2  | Betel nut (number)    |  |
| 3  | Tobbacco leaf (Kouta) |  |
| 4  | Tobbacco (number)     |  |
| 5  | Gul (Kouta)           |  |
| 6  | Biri (Packet)         |  |
| 7  | Cigaret (Packet)      |  |
| 8  | Others _____ Number   |  |
| 9  | Others _____ Number   |  |
| 10 | Others _____ Number   |  |

**Part D: [Non-food Monthly expenditure]**

| C1                                             | C2                                                       | C3                          |
|------------------------------------------------|----------------------------------------------------------|-----------------------------|
| Sl. no                                         | Types                                                    | Expenditure ammount Monthly |
| <b>4.10 Non food expenditure in last month</b> |                                                          |                             |
| 1                                              | House rent                                               |                             |
| 2                                              | Electricity Bill/Solar Power                             |                             |
| 3                                              | Gas bill                                                 |                             |
| 4                                              | Fuel wood                                                |                             |
| 5                                              | Fuel oil (kerosene, petrol)                              |                             |
| 6                                              | Transport                                                |                             |
| 7                                              | Health                                                   |                             |
| 8                                              | Education school fees, (coaching, private teacher, etc.) |                             |
| 9                                              | Notebooks/Pens/books/other study materials]              |                             |
| 10                                             | Communication expense (mobile, telephone, etc.)          |                             |
| 11                                             | Dish bills/internet bill                                 |                             |
| 12                                             | Cosmetics expense (Cream, Powder, make-up etc.)          |                             |
| 13                                             | Hair Oil/Coconut Oil                                     |                             |
| 14                                             | Cleaning and hygiene (soap, detergent, shampoo etc.)     |                             |
| 15                                             | Laundry                                                  |                             |
| 16                                             | Co-operative instalment/ Micro-credit instalment         |                             |
| 17                                             | Salon/Spa                                                |                             |
| 18                                             | Others Specify                                           |                             |

| <b>Part E: [Non-food Yearly expenditure]</b>  |                                     |                                            |
|-----------------------------------------------|-------------------------------------|--------------------------------------------|
| <b>4.11 Non-food expenditure in last year</b> |                                     |                                            |
| <b>Sl.no</b>                                  | <b>Types</b>                        | <b>Expenditure amount in the last year</b> |
| 1                                             | Clothing                            |                                            |
| 2                                             | Shoe                                |                                            |
| 3                                             | Quilt/quilt/pillow/blanket/bed      |                                            |
| 4                                             | Entertainment/religious festival    |                                            |
| 5                                             | House construction/House Renovation |                                            |
| 6                                             | Furniture                           |                                            |
| 7                                             | Insurance Premium                   |                                            |
| 8                                             | House keeper/ maids salary          |                                            |
| 9                                             | Gifts provide                       |                                            |
| 10                                            | Donation                            |                                            |
| 11                                            | Travel                              |                                            |
| 12                                            | Others Specify                      |                                            |







**Section 8: Recent Health related question**

In the below table, Each group has three boxes, put tick marks only in one of the boxes that indicate your physical condition.

| Code: |                                                                                                                                                                                                                                                                                                                                                                                                                                                                                                                                                                                                          |  |  |  |  |  |  |  |  |  |  |  |  |
|-------|----------------------------------------------------------------------------------------------------------------------------------------------------------------------------------------------------------------------------------------------------------------------------------------------------------------------------------------------------------------------------------------------------------------------------------------------------------------------------------------------------------------------------------------------------------------------------------------------------------|--|--|--|--|--|--|--|--|--|--|--|--|
| 1     | <p><b>walking</b></p> <p>1) I have no problem in walking</p> <p>2) I have problem in walking</p> <p>3) Cannot move from bed</p>                                                                                                                                                                                                                                                                                                                                                                                                                                                                          |  |  |  |  |  |  |  |  |  |  |  |  |
| 2     | <p><b>Self-care</b></p> <p>1) I have no problem with self-care</p> <p>2) I have problems washing or dressing myself</p> <p>3) I am unable to wash or dress myself</p>                                                                                                                                                                                                                                                                                                                                                                                                                                    |  |  |  |  |  |  |  |  |  |  |  |  |
| 3     | <p><b>Usual activities</b></p> <p>1) I have no problem with performing my usual activities</p> <p>2) I have some problems with performing my usual activities</p> <p>3) I am unable to perform my usual activities</p>                                                                                                                                                                                                                                                                                                                                                                                   |  |  |  |  |  |  |  |  |  |  |  |  |
| 4     | <p><b>Pain/ Discomfort</b></p> <p>1) I have no pain or discomfort</p> <p>2) I have moderate pain or discomfort</p> <p>3) I am extreme pain or discomfort</p>                                                                                                                                                                                                                                                                                                                                                                                                                                             |  |  |  |  |  |  |  |  |  |  |  |  |
| 5     | <p><b>Anxiety/ Depression</b></p> <p>1) I am not anxious or depressed</p> <p>2) I am moderately anxious or depressed</p> <p>3) I am extremely anxious or depressed</p>                                                                                                                                                                                                                                                                                                                                                                                                                                   |  |  |  |  |  |  |  |  |  |  |  |  |
| 6     | <p>To help people say how good or bad a health state is, we have drawn a scale (rather like a thermometer) on which the best state you can imagine is marked 100 and the worst state you can imagine is marked 0. We would like to indicate on this scale how good or bad your own health is today, in your opinion. Please do this by drawing a line from the box below to whichever point on the scale indicates how good or bad your health state is today.</p> <div style="border: 1px solid black; padding: 5px; width: fit-content; margin: 10px auto;"> <p>Your own health state today</p> </div> |  |  |  |  |  |  |  |  |  |  |  |  |

Indicate today's physical condition in this scale

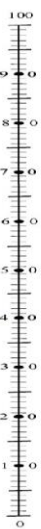

Thank You

## Household survey questionnaire (Bengali)

### Section 1: পরিচিতি সংক্রান্ত তথ্য

Questionnaire code:

উত্তরদাতার নাম: \_\_\_\_\_

উত্তরদাতা কি খানাপ্রধান ..... 1. হ্যাঁ 2. না

উত্তরদাতার ঠিকানা: \_\_\_\_\_

ইউনিয়ন: |\_\_|\_\_| (কোড-1)

ফোন নাম্বার: |\_\_|\_\_|\_\_|\_\_|\_\_|\_\_|\_\_|\_\_|\_\_|\_\_|\_\_|\_\_|\_\_|\_\_|\_\_|\_\_|

ফোন নাম্বার: নিজের (1) অন্যের (2) (অন্যের হলে সম্পর্ক উল্লেখ করুন \_\_\_\_\_)

খানা কি এসএসকে সেবাজুক্ত 1. হ্যাঁ 2. না

সাক্ষাৎকার গ্রহণকারীর কোড: |\_\_|\_\_|

সাক্ষাৎকার গ্রহণ শুরুর সময়: |\_\_|\_\_|:|\_\_|\_\_|  am/  pm

সাক্ষাৎকার গ্রহণ শেষের সময়: |\_\_|\_\_|:|\_\_|\_\_|  am/  pm

সাক্ষাৎকার গ্রহণের তারিখ: |\_\_|\_\_|:|\_\_|\_\_|:|\_\_|\_\_|\_\_|\_\_| (দিন/মাস/বছর)

জিপিএস লোকেশন:

#### কোড-1

- |                   |                    |
|-------------------|--------------------|
| 1. কোকডহড়া       | 9. পাইকড়া         |
| 2. গোহালিয়াবাড়ী | 10. পারখি          |
| 3. দশকিয়া        | 11. বলা            |
| 4. দুর্গাপুর      | 12. বাংড়া         |
| 5. নাগবাড়ী       | 13. সল্লা          |
| 6. বীরবাসিন্দা    | 14. এলেঙ্গা পৌরসভা |
| 7. সহদেবপুর       | 15. কালিহাতি       |
| 8. নারান্দিয়া    |                    |

Section 2: খানার সদস্যদের তথ্য

| ক1           | ক2                           | ক3                         | ক4                     | ক5                 | ক6             | ক7                                                                       | ক8          | ক9                                   | ক10 | ক11                                                                        |                             |                         |                                        |    |                          |
|--------------|------------------------------|----------------------------|------------------------|--------------------|----------------|--------------------------------------------------------------------------|-------------|--------------------------------------|-----|----------------------------------------------------------------------------|-----------------------------|-------------------------|----------------------------------------|----|--------------------------|
| ( সদস্যকোড ) | নাম<br>(সংক্ষিপ্ত নাম লিখুন) | খানা প্রধানের সাথে সম্পর্ক | লিঙ্গ                  | বয়স<br>(পূর্ণবছর) | বৈবাহিক অবস্থা | সদস্য কত বছর প্রাতিষ্ঠানিক শিক্ষাগ্রহণ করেছে (শিক্ষা না থাকলে "০" লিখুন) | প্রধান পেশা |                                      |     | এই সদস্যের কি নিম্নমিত উপার্জন হয়? হ্যাঁ (1) না (2)<br>প্রয়োজ্য নয় (99) | গত ৩০ দিনে কতদিন কাজ করেছেন | গত ৩০ দিনে আয় (টাকায়) |                                        |    |                          |
|              |                              | 1                          | খানাপ্রধান নিজে        | 1                  | পুরুষ          |                                                                          | 1           | বিবাহিত                              | 1   |                                                                            |                             |                         | কৃষিকাজ                                | 16 | শ্রমিক                   |
|              |                              | 2                          | স্বামী/স্ত্রী          | 2                  | মহিলা          |                                                                          | 2           | অবিবাহিত                             | 2   |                                                                            |                             |                         | গৃহিণী                                 | 17 | জেলে/ম্মাঝি/মৎসচাষী      |
|              |                              | 3                          | বাবা/মা                |                    |                |                                                                          | 3           | বিপন্নিক/বিধবা                       | 3   |                                                                            |                             |                         | দিনমজুর                                | 18 | ক্ষুদ্র কুঠিরশিল্প       |
|              |                              | 4                          | পুত্র/কন্যা            |                    |                |                                                                          | 4           | ভানাকপ্রাপ্ত/পৃথকীকৃত<br>(Separated) | 4   |                                                                            |                             |                         | রিম্মা/ভ্যান চালক                      | 19 | গার্মেন্টস কর্মী         |
|              |                              | 5                          | স্বশুর/শশুড়ি          |                    |                |                                                                          | 5           | স্বামী পরিত্যক্তা                    | 5   |                                                                            |                             |                         | চালক (অটো/সিএন<br>জি)                  | 20 | রেস্টুরেন্ট কর্মী        |
|              |                              | 6                          | ভাই/বোন                |                    |                |                                                                          | 6           | অন্যান্য (উল্লেখ<br>করুন)            | 6   |                                                                            |                             |                         | গৃহকর্মী                               | 21 | মিস্ত্রী/ইলেক্ট্রিশিয়ান |
|              |                              | 7                          | জামাতা/পুত্রবধু        |                    |                |                                                                          |             |                                      | 7   |                                                                            |                             |                         | চাকুরী                                 | 22 | দোকান কর্মচারী           |
|              |                              | 8                          | নাতি/নাতনী             |                    |                |                                                                          |             |                                      | 8   |                                                                            |                             |                         | দোকানদার                               | 23 | নাপিত                    |
|              |                              | 9                          | আস্বীয়                |                    |                |                                                                          |             |                                      | 9   |                                                                            |                             |                         | ভিক্ষাবৃত্তি                           | 24 | দর্জি                    |
|              |                              | 10                         | পালিত সন্তান/সৎ সন্তান |                    |                |                                                                          |             |                                      | 10  |                                                                            |                             |                         | বেকার                                  | 25 | শিক্ষক                   |
|              |                              | 11                         | চাচী/মামি/খালা/ফুফু    |                    |                |                                                                          |             |                                      | 11  |                                                                            |                             |                         | ছাত্রছাত্রী                            | 26 | ড্রাম্যমাণ ব্যবসা        |
|              |                              | 12                         | দাদা/দাদী              |                    |                |                                                                          |             |                                      | 12  |                                                                            |                             |                         | বন্ধ/বন্ধা                             | 27 | প্রযোজ্য নয়             |
|              |                              | 13                         | আস্বীয় স্বজন নয় এমন  |                    |                |                                                                          |             |                                      | 13  |                                                                            |                             |                         | শিশু                                   | 28 | শারীরিক ভাবে অক্ষম       |
|              |                              | 14                         | অন্যান্য (উল্লেখ করুন) |                    |                |                                                                          |             |                                      | 14  |                                                                            |                             |                         | খামার (কৃষি,<br>মৎস, দুগ্ধ ও<br>মুরগী) | 29 | অন্যান্য<br>(উল্লেখকরুন) |
| 15           |                              |                            |                        |                    |                | 15                                                                       | বর্গাচাষ    |                                      |     |                                                                            |                             |                         |                                        |    |                          |
|              |                              |                            |                        |                    |                |                                                                          |             |                                      |     |                                                                            |                             |                         |                                        |    |                          |
|              |                              |                            |                        |                    |                |                                                                          |             |                                      |     |                                                                            |                             |                         |                                        |    |                          |
|              |                              |                            |                        |                    |                |                                                                          |             |                                      |     |                                                                            |                             |                         |                                        |    |                          |
|              |                              |                            |                        |                    |                |                                                                          |             |                                      |     |                                                                            |                             |                         |                                        |    |                          |
|              |                              |                            |                        |                    |                |                                                                          |             |                                      |     |                                                                            |                             |                         |                                        |    |                          |
|              |                              |                            |                        |                    |                |                                                                          |             |                                      |     |                                                                            |                             |                         |                                        |    |                          |
|              |                              |                            |                        |                    |                |                                                                          |             |                                      |     |                                                                            |                             |                         |                                        |    |                          |

### Section 3: খানা সংক্রান্ত তথ্য

#### Part 3A: বসতভিটা ও জমাজমি সম্পর্কিত তথ্য

|    |                                                                                    |                                                                                                                                                                        |                                                                                                                |       |    |
|----|------------------------------------------------------------------------------------|------------------------------------------------------------------------------------------------------------------------------------------------------------------------|----------------------------------------------------------------------------------------------------------------|-------|----|
| 1  | আপনারা যে বাড়িতে থাকেন তার জমির মালিক কি আপনারা নিজে?                             | 1. হ্যাঁ (→ 3 নং এ যান)                                                                                                                                                | 2. না                                                                                                          |       |    |
| 2  | বাড়ির জমি নিজের না হলে কার?                                                       | 1. অন্যের জমি<br>2. রাস্তায়/সরকারী কোন জমি<br>3. ভাড়া করা<br>ভাড়া করা হলে আয়তন লিখুন -----বর্গফুট                                                                  |                                                                                                                |       |    |
| 3  | সাম্রাংকার গ্রহনকারীর দৃষ্টিতে খানার আশেপাশের পরিবেশ কেমন? (নিজে পর্যবেক্ষণ করবেন) | 5. পরিষ্কার<br>6. মোটামুটি পরিষ্কার<br>7. নোংড়া<br>8. খুব নোংড়া                                                                                                      |                                                                                                                |       |    |
| 4  | বাড়ির জমি ছাড়া আপনাদের পরিবারের অন্য কোন জমি আছে কি?                             | 1. হ্যাঁ                                                                                                                                                               | 2. না                                                                                                          |       |    |
| 5  | পরিবারের জমি/বসত ভিটার পরিমাণ লিখুন                                                | বসত ভিটা (পুকুর এবং ডোবা সহ বাড়ির জমি):<br>পাকি: _____ শতাংশ _____ = শতাংশ _____<br>কৃষি জমি:<br>পাকি: _____ শতাংশ _____ = শতাংশ _____                                |                                                                                                                |       |    |
| 6  | খানায় কতগুলি ঘর আছে?                                                              | সংখ্যা: _____                                                                                                                                                          |                                                                                                                |       |    |
| 7  | প্রধান ঘর কি কি উপকরণ দ্বারা তৈরী (যাচাই করুন)                                     | 10. পাকা/ আধা পাকা<br>11. টিল<br>12. টিল এবং বাঁশ<br>13. টিল এবং অন্যান্য<br>14. বাঁশ এবং অন্যান্য<br>15. কাঁচা (মাটি)<br>16. কাঠ<br>17. সিরামিক/টাইলস<br>18. অন্যান্য | ছাদ: _____ দেওয়াল: _____ মেঝে: _____<br>অন্যান্য হলে উল্লেখ করুন:<br>ছাদ _____<br>দেওয়াল _____<br>মেঝে _____ |       |    |
| 8  | উল্লেখিত দ্রব্যসামগ্রী/ সম্পদগুলি কি আপনার খানায় আছে? (একাধিক উত্তর হতে পারে)     | নং                                                                                                                                                                     | পণ্য/ দ্রব্যসামগ্রী                                                                                            | হ্যাঁ | না |
|    |                                                                                    | 26.                                                                                                                                                                    | গরু/ ছাগল                                                                                                      | 1     | 2  |
|    |                                                                                    | 27.                                                                                                                                                                    | মাছ ধরার জাল                                                                                                   | 1     | 2  |
|    |                                                                                    | 28.                                                                                                                                                                    | হাঁস / মুরগী                                                                                                   | 1     | 2  |
|    |                                                                                    | 29.                                                                                                                                                                    | মুদি দোকান                                                                                                     | 1     | 2  |
|    |                                                                                    | 30.                                                                                                                                                                    | রিম্মা / ভ্যান / অটো রিম্মা                                                                                    | 1     | 2  |
|    |                                                                                    | 31.                                                                                                                                                                    | কৃষি যন্ত্রপাতি (সেচ মেশিন, চাষকরার যন্ত্র)                                                                    | 1     | 2  |
|    |                                                                                    | 32.                                                                                                                                                                    | লৌকা                                                                                                           | 1     | 2  |
|    |                                                                                    | 33.                                                                                                                                                                    | খাট / চৌকি                                                                                                     | 1     | 2  |
|    |                                                                                    | 34.                                                                                                                                                                    | কাথা / কস্থল                                                                                                   | 1     | 2  |
|    |                                                                                    | 35.                                                                                                                                                                    | তোষক                                                                                                           | 1     | 2  |
|    |                                                                                    | 36.                                                                                                                                                                    | হারিকেন                                                                                                        | 1     | 2  |
|    |                                                                                    | 37.                                                                                                                                                                    | চেয়ার / টেবিল                                                                                                 | 1     | 2  |
|    |                                                                                    | 38.                                                                                                                                                                    | ডাইনিং টেবিল                                                                                                   | 1     | 2  |
|    |                                                                                    | 39.                                                                                                                                                                    | আলমারি / শোকেস                                                                                                 | 1     | 2  |
|    |                                                                                    | 40.                                                                                                                                                                    | শোফা সেট                                                                                                       | 1     | 2  |
|    |                                                                                    | 41.                                                                                                                                                                    | টেলিভিশন                                                                                                       | 1     | 2  |
|    |                                                                                    | 42.                                                                                                                                                                    | রেডিও / টেপ রেকর্ডার                                                                                           | 1     | 2  |
|    |                                                                                    | 43.                                                                                                                                                                    | ঘড়ি / দেওয়াল ঘড়ি                                                                                            | 1     | 2  |
|    |                                                                                    | 44.                                                                                                                                                                    | টেলিফোন / মোবাইল ফোন                                                                                           | 1     | 2  |
|    |                                                                                    | 45.                                                                                                                                                                    | বাইসাইকেল                                                                                                      | 1     | 2  |
|    |                                                                                    | 46.                                                                                                                                                                    | মোটর সাইকেল                                                                                                    | 1     | 2  |
|    |                                                                                    | 47.                                                                                                                                                                    | ফ্রিজ                                                                                                          | 1     | 2  |
|    |                                                                                    | 48.                                                                                                                                                                    | ফ্যান                                                                                                          | 1     | 2  |
|    |                                                                                    | 49.                                                                                                                                                                    | সেলাই মেশিন                                                                                                    | 1     | 2  |
|    |                                                                                    | 50.                                                                                                                                                                    | অন্যান্য (উল্লেখ করুন) _____                                                                                   | 1     | 2  |
| 9  | আপনার কোন ধরনের পায়খানা ব্যবহার করেন?                                             | নং                                                                                                                                                                     | পায়খানার ধরন                                                                                                  | হ্যাঁ | না |
|    |                                                                                    | 1                                                                                                                                                                      | পীট পায়খানা                                                                                                   | 1     | 2  |
|    |                                                                                    | 2                                                                                                                                                                      | পাকা পায়খানা                                                                                                  | 1     | 2  |
|    |                                                                                    | 3                                                                                                                                                                      | কাঁচা পায়খানা                                                                                                 | 1     | 2  |
|    |                                                                                    | 4                                                                                                                                                                      | সেনিটারী                                                                                                       | 1     | 2  |
|    |                                                                                    | 5                                                                                                                                                                      | অন্যান্য (উল্লেখ করুন) _____                                                                                   | 1     | 2  |
| 10 | আপনাদের খাবার পানির মূল উৎস কি?                                                    | নং                                                                                                                                                                     | উৎসের ধরন                                                                                                      | হ্যাঁ | না |
|    |                                                                                    | 1                                                                                                                                                                      | টিউবওয়েল                                                                                                      | 1     | 2  |
|    |                                                                                    | 2                                                                                                                                                                      | পুকুর/নদী/ডোবা/ নালা                                                                                           | 1     | 2  |

|    |                              |          |                         |   |   |
|----|------------------------------|----------|-------------------------|---|---|
|    |                              | 3        | বৃষ্টির পানি            | 1 | 2 |
|    |                              | 4        | পাইপ/ট্যাপ/সাপ্লাই পানি | 1 | 2 |
|    |                              | 5        | বিশুদ্ধকৃত/ফিল্টার পানি | 1 | 2 |
|    |                              | 6        | অন্যান্য (উল্লেখ করুন)  | 1 | 2 |
| 11 | খানায় কি বিদ্যুৎ সংযোগ আছে? | 1. হ্যাঁ | 2. না                   |   |   |

### Part 3B: খানার অন্যান্য আয়ের উৎস

|    |                                                                                                                                                             |                                |       |                  |                       |
|----|-------------------------------------------------------------------------------------------------------------------------------------------------------------|--------------------------------|-------|------------------|-----------------------|
| 12 | খানার কি স্থায়ী কোন আয়ের উৎস আছে?                                                                                                                         | 1. হ্যাঁ                       | 2. না |                  |                       |
| 14 | খানায় কি কোন শিশু উপার্জনকারী আছে?                                                                                                                         | 1. হ্যাঁ                       | 2. না | 99. প্রযোজ্য নয় |                       |
| 15 | গত 12 মাসে খানার অন্যান্য আয়ের উৎসগুলি কি ছিল এবং আয়ের পরিমাণ কত? (একাধিক উত্তর হতে পারে) (Section-2 এ যেসব আয় ধরা হয়েছে তা বাদ দিয়ে অন্তর্ভুক্ত করুন) | আয়ের উৎস                      |       |                  | আয়ের পরিমাণ (টাকায়) |
|    |                                                                                                                                                             | 1. কাজের বিনিময়ে খাদ্য        |       |                  |                       |
|    |                                                                                                                                                             | 2. সম্পদ থেকে আয়              |       |                  |                       |
|    |                                                                                                                                                             | 3. ভিজিডি/দুস্থ: ভাতা          |       |                  |                       |
|    |                                                                                                                                                             | 4. বয়স্ক ভাতা                 |       |                  |                       |
|    |                                                                                                                                                             | 5. অবসর ভাতা                   |       |                  |                       |
|    |                                                                                                                                                             | 6. মুক্তিযোদ্ধা ভাতা           |       |                  |                       |
|    |                                                                                                                                                             | 7. রেমিটেন্স                   |       |                  |                       |
|    |                                                                                                                                                             | 8. উপবৃত্তি/শিক্ষাবৃত্তি       |       |                  |                       |
|    |                                                                                                                                                             | 9. অন্যান্য ভাতা               |       |                  |                       |
|    |                                                                                                                                                             | 10. অন্যান্য উৎস (উল্লেখ করুন) |       |                  |                       |

### Part 3C: খানার ঋণ সংক্রান্ত তথ্য

|    |                                                          |                             |                                        |                                                      |                                 |
|----|----------------------------------------------------------|-----------------------------|----------------------------------------|------------------------------------------------------|---------------------------------|
| 16 | খানার কোন সদস্য কি গত একবছরে কোনো ঋণের সাথে যুক্ত ছিলেন? | 1. হ্যাঁ                    | 2. না                                  |                                                      |                                 |
|    | হ্যাঁ হলে নিচের টেবিল পূরণ করুন                          |                             |                                        | গত এক বছরে ঋণের টাকা কোথায় বিনিয়োগ করেছেন? (কোড:2) |                                 |
|    | সদস্য কোড                                                | কোন আর্থিক ঋণের সাথে যুক্ত? | সর্বশেষ কতটাকা ঋণ হিসেবে গ্রহণ করেছেন? | বর্তমানে অপরিশোধিত ঋণের পরিমাণ কত?                   | কোড:2                           |
|    |                                                          | 1. সমিতি                    |                                        |                                                      | 1. হাঁস মুরগী পালন              |
|    |                                                          | 2. ক্ষুদ্র ঋণদানকারী সংস্থা |                                        |                                                      | 2. গরু ছাগল পালন                |
|    |                                                          | 3. ব্যাংক থেকে              |                                        |                                                      | 3. হস্ত শিল্প                   |
|    |                                                          | 4. অন্যান্য (উল্লেখ করুন)   |                                        |                                                      | 4. কৃষি কাজ                     |
|    |                                                          |                             |                                        |                                                      | 5. গৃহ নির্মাণ/মেরামত           |
|    |                                                          |                             |                                        |                                                      | 6. বিবাহে                       |
|    |                                                          |                             |                                        |                                                      | 7. ভোগ সামগ্রী ক্রয়ের জন্য     |
|    |                                                          |                             |                                        |                                                      | 8. শিক্ষা খরচ বাবদ              |
|    |                                                          |                             |                                        |                                                      | 9. চিকিৎসা বাবদ                 |
|    |                                                          |                             |                                        |                                                      | 10. মাছ ধরার উপকরণ ক্রয়ে       |
|    |                                                          |                             |                                        |                                                      | 11. নৌকা ক্রয়                  |
|    |                                                          |                             |                                        |                                                      | 12. ভ্যান/রিক্সা ক্রয়          |
|    |                                                          |                             |                                        |                                                      | 13. ক্ষুদ্র ব্যবসা/দোকান চালানো |
|    |                                                          |                             |                                        |                                                      | 14. ব্যবসা                      |
|    |                                                          |                             |                                        |                                                      | 15. কৃষি যন্ত্র ক্রয়           |
|    |                                                          |                             |                                        |                                                      | 16. ধার/দেনা পরিশোধ             |
|    |                                                          |                             |                                        |                                                      | 17. বিদেশে পাঠানো               |
|    |                                                          |                             |                                        |                                                      | 18. অন্যান্য                    |

### Part 3D: খানার খাদ্য নিরাপত্তা

|    |                                                                                                                                                           |                                             |  |  |
|----|-----------------------------------------------------------------------------------------------------------------------------------------------------------|---------------------------------------------|--|--|
| 18 | গত এক বছরে আপনি/আপনার পরিবার গড়ে কতদিন তিনবেলা পেটভরে খেতে পেরেছে? (উৎসবের দিন বাদ দিয়ে)                                                                | 1. প্রায় সবদিন (প্রতিদিন তিনবেলা)          |  |  |
|    |                                                                                                                                                           | 2. মাঝেমাঝে (প্রতিদিন তিনবেলা)              |  |  |
|    |                                                                                                                                                           | 3. খুব কম (এ বছর ১-৬ দিন, প্রতিদিন তিনবেলা) |  |  |
|    |                                                                                                                                                           | 4. কখনই খায়নি                              |  |  |
| 19 | গত এক একবছরে খাবার স্বল্পতার কারণে গড়ে এমন কতদিন হয়েছে যে আপনি না খেয়ে কাটিয়েছেন?                                                                     | 1. কখনই না                                  |  |  |
|    |                                                                                                                                                           | 2. খুব কম দিনই (বছরে ১-৬ দিন)               |  |  |
|    |                                                                                                                                                           | 3. মাঝে মাঝে (বছরে ৭-১২ দিন)                |  |  |
|    |                                                                                                                                                           | 4. প্রায় (মাসে কয়েকবার)                   |  |  |
| 20 | গত এক একবছরে খাবার স্বল্পতার কারণে আপনি কি কোন বেলা কম খেয়ে কাটিয়েছেন?                                                                                  | 1. কখনই না                                  |  |  |
|    |                                                                                                                                                           | 2. খুব কম দিনই (বছরে ১-৬ দিন)               |  |  |
|    |                                                                                                                                                           | 3. মাঝে মাঝে (বছরে ৭-১২ দিন)                |  |  |
|    |                                                                                                                                                           | 4. প্রায় (মাসে কয়েকবার)                   |  |  |
| 21 | গত এক একবছরে গড়ে কতবার আপনি বা আপনার পরিবারের কেউ কোন ভাতের স্বল্পতার কারণে রুটি অথবা অন্যকিছু খেয়ে কাটিয়েছেন যদিও? (অসুস্থতার কারণে হলে বাদ দিতে হবে) | 1. কখনই না                                  |  |  |
|    |                                                                                                                                                           | 2. খুব কম দিনই (বছরে ১-৬ দিন)               |  |  |
|    |                                                                                                                                                           | 3. মাঝে মাঝে (বছরে ৭-১২ দিন)                |  |  |
|    |                                                                                                                                                           | 4. প্রায় (মাসে কয়েকবার)                   |  |  |
| 22 | গত এক একবছরে গড়ে কতবার আপনার পরিবার খাবার ছিলনা বলে আল্লায়স্বজন/প্রতিবেশির কাছে খাবার চেয়েছিল?                                                         | 1. কখনই না                                  |  |  |
|    |                                                                                                                                                           | 2. খুব কম দিনই (বছরে ১-৬ দিন)               |  |  |
|    |                                                                                                                                                           | 3. মাঝে মাঝে (বছরে ৭-১২ দিন)                |  |  |
|    |                                                                                                                                                           | 4. প্রায় (মাসে কয়েকবার)                   |  |  |
| 23 | নিজের জমি থেকে যে আয় হয় তা দিয়ে আপনারদের কয়মাস চলে? (এক বছরে)                                                                                         | _____ মাস                                   |  |  |

### Section 4: খানার ব্যয় সংক্রান্ত তথ্য

|         |             |                                           |
|---------|-------------|-------------------------------------------|
| কঃ 1    | কঃ 2        | কঃ 3                                      |
| ক্রঃ নং | খাদ্যের ধরন | ভোগের পরিমাণ (ভোগ না করে থাকলে "0" লিখুন) |

#### Part A: খাদ্য (সাপ্তাহিক ব্যয়)

##### 4.1 গত এক সপ্তাহে খাদ্য শস্য

|   |                    |  |
|---|--------------------|--|
| 1 | চাল-মোটা (কেজি)    |  |
|   | চাল-চিকন (কেজি)    |  |
| 2 | আটা (কেজি)         |  |
| 3 | ময়দা (কেজি)       |  |
| 4 | চিড়া/মুড়ি (কেজি) |  |

| 4.2 গত এক সপ্তাহে ডাল জাতীয় শস্য   |                                         |                                           |
|-------------------------------------|-----------------------------------------|-------------------------------------------|
| 1                                   | মশুর ডাল (কেজি)                         |                                           |
| 2                                   | ছেলার ডাল (কেজি)                        |                                           |
| 3                                   | মাস কালাই (কেজি)                        |                                           |
| 4                                   | খেসারী (কেজি)                           |                                           |
| 5                                   | মুগ (কেজি)                              |                                           |
| 6                                   | বুট (কেজি)                              |                                           |
| 7                                   | গ্যাংকর (কেজি)                          |                                           |
| 4.3 গত এক সপ্তাহে ভোজ্য তেল         |                                         |                                           |
| 1                                   | সয়াবিন তেল (লিটার)                     |                                           |
| 2                                   | সরিষার তেল (লিটার)                      |                                           |
| 3                                   | ডালডা (কেজি)                            |                                           |
| 4                                   | ঘি (কেজি)                               |                                           |
| 5                                   | পাম অয়েল (লিটার)                       |                                           |
| 6                                   | অন্যান্য তেল (লিটার) _____              |                                           |
| 4.4 এক সপ্তাহে শাক / সবজি           |                                         |                                           |
| 1                                   | লাল শাক (কেজি/আটি)                      |                                           |
| 2                                   | পুই শাক (কেজি/আটি)                      |                                           |
| 3                                   | পালং শাক (কেজি/আটি)                     |                                           |
| 4                                   | কলমি শাক (কেজি/আটি)                     |                                           |
| 5                                   | অন্যান্য শাক _____ (কেজি/আটি)           |                                           |
| 6                                   | অন্যান্য শাক _____ (কেজি/আটি)           |                                           |
| 7                                   | অন্যান্য শাক _____ (কেজি/আটি)           |                                           |
| 8                                   | আলু (কেজি)                              |                                           |
| 9                                   | পটল (কেজি)                              |                                           |
| 10                                  | করলা (কেজি)                             |                                           |
| 11                                  | ফুলকপি (কেজি/পিছ)                       |                                           |
| 12                                  | বাধাকপি (কেজি/পিছ)                      |                                           |
| 13                                  | বেগুন (কেজি)                            |                                           |
| 14                                  | কচু (কেজি)                              |                                           |
| 15                                  | লাউ (সংখ্যা)                            |                                           |
| 16                                  | টমেটো (কেজি)                            |                                           |
| 17                                  | কাঁচা পেপে (কেজি)                       |                                           |
| 18                                  | কাঁচা কলা (সংখ্যা)                      |                                           |
| 19                                  | কাঁচা মরিচ (কেজি)                       |                                           |
| 20                                  | পেয়াজ (কেজি)                           |                                           |
| 21                                  | রসুন (কেজি)                             |                                           |
| 22                                  | আদা (কেজি)                              |                                           |
| 23                                  | অন্যান্য সবজি _____ (কেজি)              |                                           |
| 24                                  | অন্যান্য সবজি _____ (কেজি)              |                                           |
| 25                                  | অন্যান্য সবজি _____ (কেজি)              |                                           |
| Part B: খাদ্য (মাসিক ব্যয়)         |                                         |                                           |
| 4.5 গত এক মাসে মসলা                 |                                         |                                           |
| ক্রঃ নং                             | খাদ্যের ধরন                             | ভোগের পরিমাণ (ভোগ না করে থাকলে "0" লিখুন) |
| কঃ 1                                | কঃ 2                                    | কঃ 3                                      |
| 1                                   | শুকনা মরিচ (গ্রাম)                      |                                           |
| 2                                   | হলুদ (গ্রাম)                            |                                           |
| 3                                   | জিরা (গ্রাম)                            |                                           |
| 4                                   | দারুচিনি (গ্রাম)                        |                                           |
| 5                                   | এলাচি (গ্রাম)                           |                                           |
| 6                                   | অন্যান্য মসলা _____ (গ্রাম)             |                                           |
| 7                                   | অন্যান্য মসলা _____ (গ্রাম)             |                                           |
| 8                                   | অন্যান্য মসলা _____ (গ্রাম)             |                                           |
| 4.6 গত এক মাসে মাছ, মাংস, ডিম ও দুধ |                                         |                                           |
| 1                                   | বড় মাছ (কেজি)                          |                                           |
| 2                                   | ছোট মাছ (কেজি)                          |                                           |
| 3                                   | শুটকি মাছ (কেজি)                        |                                           |
| 4                                   | গরুর মাংস (কেজি)                        |                                           |
| 5                                   | মহিষের মাংস (কেজি)                      |                                           |
| 6                                   | দেশী মুরগীর মাংস (কেজি)                 |                                           |
| 7                                   | ফার্মের মুরগীর মাংস (কেজি)              |                                           |
| 8                                   | হাঁসের মাংস (কেজি)                      |                                           |
| 9                                   | খাসীর মাংস (কেজি)                       |                                           |
| 10                                  | ডিম (সংখ্যা)                            |                                           |
| 11                                  | দুধ (লিটার)                             |                                           |
| 12                                  | অন্যান্য আমিষ জাতীয় খাবার _____ (কেজি) |                                           |

|                                                           |                                            |  |
|-----------------------------------------------------------|--------------------------------------------|--|
| 13                                                        | অন্যান্য আমিষ জাতীয়<br>থাবার _____ (কেজি) |  |
| 14                                                        | অন্যান্য আমিষ জাতীয়<br>থাবার _____ (কেজি) |  |
| <b>4.7 গত এক মাসে ফল - ফলাদি</b>                          |                                            |  |
| 1                                                         | কলা (সংখ্যা)                               |  |
| 2                                                         | বড়ই (কেজি)                                |  |
| 3                                                         | জলপাই (কেজি)                               |  |
| 4                                                         | পাকা পেপে (কেজি)                           |  |
| 5                                                         | আম (কেজি)                                  |  |
| 6                                                         | কাঁঠাল (সংখ্যা)                            |  |
| 7                                                         | জাম (কেজি)                                 |  |
| 8                                                         | আপেল (কেজি)                                |  |
| 9                                                         | কমলা (সংখ্যা)                              |  |
| 10                                                        | আংগুর (কেজি)                               |  |
| 11                                                        | পেয়ারা (কেজি)                             |  |
| 12                                                        | আনারস (সংখ্যা)                             |  |
| 13                                                        | অন্যান্য ফল _____ (কেজি)                   |  |
| 14                                                        | অন্যান্য ফল _____ (কেজি)                   |  |
| 15                                                        | অন্যান্য ফল _____ (কেজি)                   |  |
| <b>4.8 গত এক মাসে অন্যান্য থাবার</b>                      |                                            |  |
| 1                                                         | চিনি (কেজি)                                |  |
| 2                                                         | গুর (কেজি)                                 |  |
| 3                                                         | গুঁড়ো দুধ (কেজি)                          |  |
| 4                                                         | লবন (কেজি)                                 |  |
| 5                                                         | নুডুলস (প্যাকেট)                           |  |
| 6                                                         | সুজি/সেমাই (কেজি)                          |  |
| 7                                                         | কোমল পানীয় (লিটার)                        |  |
| 8                                                         | মিষ্টি জাতীয় খাদ্য (কেজি)                 |  |
| 9                                                         | শিশুখাদ্য _____ (কেজি)                     |  |
| 10                                                        | চা-পাতা (কেজি)                             |  |
| 11                                                        | বিস্কুট (প্যাকেট)                          |  |
| 12                                                        | চানাচুর (প্যাকেট)                          |  |
| 13                                                        | অন্যান্য _____ (সংখ্যা)                    |  |
| 14                                                        | অন্যান্য _____ (কেজি)                      |  |
| 15                                                        | অন্যান্য _____ (কেজি)                      |  |
| <b>Part C: তামাক জাতীয় দ্রব্য (সপ্তাহিক ব্যয়)</b>       |                                            |  |
| <b>4.9 গত এক সপ্তাহে তামাক জাতীয় দ্রব্য ভোগের পরিমাণ</b> |                                            |  |
| 1                                                         | পান (সংখ্যা)                               |  |
| 2                                                         | সুপারী (সংখ্যা)                            |  |
| 3                                                         | জর্দা (কৌটা)                               |  |
| 4                                                         | তামাক (সংখ্যা)                             |  |
| 5                                                         | গুল (কৌটা)                                 |  |
| 6                                                         | বিড়ি (প্যাকেট)                            |  |
| 7                                                         | সিগারেট (প্যাকেট)                          |  |
| 8                                                         | অন্যান্য _____ (সংখ্যা)                    |  |
| 9                                                         | অন্যান্য _____ (সংখ্যা)                    |  |
| 10                                                        | অন্যান্য _____ (সংখ্যা)                    |  |



| Part D: খাদ্য বাদে (মাসিক ব্যয়)        |                                                                        |                      |
|-----------------------------------------|------------------------------------------------------------------------|----------------------|
| ক 1                                     | ক 2                                                                    | ক 3                  |
| ক্র:নং                                  | খাত                                                                    | থরচের পরিমাণ (মাসিক) |
| <b>4.10 গত এক মাসে খাদ্য বাদে ব্যয়</b> |                                                                        |                      |
| 1                                       | বাসা ভাড়া                                                             |                      |
| 2                                       | বিদ্যুৎ বিল/ সৌর বিদ্যুৎ                                               |                      |
| 3                                       | গ্যাস বিল/ গ্যাস সিলিন্ডার                                             |                      |
| 4                                       | স্থানীয় কাঠ                                                           |                      |
| 5                                       | স্থানীয় তৈল (কেরোসিন, পেট্রোল..)                                      |                      |
| 6                                       | পরিবহন                                                                 |                      |
| 7                                       | স্বাস্থ্য                                                              |                      |
| 8                                       | শিক্ষা (স্কুলের বেতন, কোচিং, প্রাইভেট টিচার ইত্যাদি)                   |                      |
| 9                                       | খাতা/কলম/বই/ অন্যান্য শিক্ষা উপকরণ                                     |                      |
| 10                                      | যোগাযোগ ব্যয় (মোবাইল, টেলিফোন ইত্যাদি)                                |                      |
| 11                                      | ডিশ বিল/ইন্টারনেট ব্যয়                                                |                      |
| 12                                      | কসমেটিক ব্যয় (ক্রিম, পাউডার, মেকাপ ইত্যাদি)                           |                      |
| 13                                      | চুলে ব্যবহারের তেল (নাড়িকেল তেল)                                      |                      |
| 14                                      | পরিষ্কার ও পরিচ্ছন্নতা (সাবান, টুথপেস্ট, ডিটারজেন্ট, শ্যাম্পু ইত্যাদি) |                      |
| 15                                      | লন্ডি                                                                  |                      |
| 16                                      | সমিতির কিস্তি/স্ক্রলনের কিস্তি                                         |                      |
| 17                                      | সেলুন/পার্কার                                                          |                      |
| 18                                      | অন্যান্য (নির্দিষ্টকরেবলুন)                                            |                      |

| Part E: খাদ্যবাদে (বার্ষিক ব্যয়) |                                 |                        |
|-----------------------------------|---------------------------------|------------------------|
| 4.11 গত এক বছরে খাদ্য বাদে ব্যয়  |                                 |                        |
| ক1                                | ক2                              | ক3                     |
| ক্র:নং                            | খাত                             | থরচের পরিমাণ (বার্ষিক) |
| 1                                 | পোশাক                           |                        |
| 2                                 | জুতা                            |                        |
| 3                                 | লেপ/তোষক/বালিশ/চাদর/বিছানা      |                        |
| 4                                 | বিনোদন / ধর্মীয় অনুষ্ঠান       |                        |
| 5                                 | গৃহ নির্মাণ/গৃহ সংস্কার         |                        |
| 6                                 | আসবাবপত্র                       |                        |
| 7                                 | ইন্সুরেন্স প্রিমিয়াম           |                        |
| 8                                 | গৃহপরিচালক / গৃহপরিচালিকার বেতন |                        |
| 9                                 | উপহার প্রদান                    |                        |
| 10                                | দান/ফিতরা                       |                        |
| 11                                | ভ্রমণ                           |                        |
| 12                                | অন্যান্য (নির্দিষ্টকরেবলুন)     |                        |

| Section 5: খানার সদস্যদের বিগত তিন মাসে অসুস্থতা, চিকিৎসা এবং তার ব্যয় সম্পর্কিত তথ্য (একাধিক অসুস্থতার তথ্য সদস্য কোড সহ ভিন্ন ভিন্ন সারিতে লিখুন)          |                            |                                      |                                                                                                                          |                                             |                                                                                                                                                                                                                                                     |                                                                                                                                                                                                                                                                                                                                                                                                                                                                                                                                                                                                         |                                     |                                                                                                                            |                                                                                                             |                                                                                                                                                                                                                                                                                                                                                                                              |                                                                                                                                                                                                                                                                                                                                                                                                                                           |  |  |    |     |     |     |       |      |       |      |       |      |  |
|---------------------------------------------------------------------------------------------------------------------------------------------------------------|----------------------------|--------------------------------------|--------------------------------------------------------------------------------------------------------------------------|---------------------------------------------|-----------------------------------------------------------------------------------------------------------------------------------------------------------------------------------------------------------------------------------------------------|---------------------------------------------------------------------------------------------------------------------------------------------------------------------------------------------------------------------------------------------------------------------------------------------------------------------------------------------------------------------------------------------------------------------------------------------------------------------------------------------------------------------------------------------------------------------------------------------------------|-------------------------------------|----------------------------------------------------------------------------------------------------------------------------|-------------------------------------------------------------------------------------------------------------|----------------------------------------------------------------------------------------------------------------------------------------------------------------------------------------------------------------------------------------------------------------------------------------------------------------------------------------------------------------------------------------------|-------------------------------------------------------------------------------------------------------------------------------------------------------------------------------------------------------------------------------------------------------------------------------------------------------------------------------------------------------------------------------------------------------------------------------------------|--|--|----|-----|-----|-----|-------|------|-------|------|-------|------|--|
| গত তিন মাসে আপনি বা আপনার খানার কোন সদস্য কি কোন রোগের লক্ষণ/ কোন রোগে আক্রান্ত হয়েছিল কি? .....1. হ্যাঁ..... 2. না (হ্যাঁ হলে নিম্নোক্ত টেবিল টি পূরণ করুন) |                            |                                      |                                                                                                                          |                                             |                                                                                                                                                                                                                                                     |                                                                                                                                                                                                                                                                                                                                                                                                                                                                                                                                                                                                         |                                     |                                                                                                                            |                                                                                                             |                                                                                                                                                                                                                                                                                                                                                                                              |                                                                                                                                                                                                                                                                                                                                                                                                                                           |  |  |    |     |     |     |       |      |       |      |       |      |  |
| ক1                                                                                                                                                            | ক2                         | ক3                                   | ক4                                                                                                                       | ক5                                          | ক6                                                                                                                                                                                                                                                  |                                                                                                                                                                                                                                                                                                                                                                                                                                                                                                                                                                                                         | ক7                                  | ক8                                                                                                                         |                                                                                                             |                                                                                                                                                                                                                                                                                                                                                                                              |                                                                                                                                                                                                                                                                                                                                                                                                                                           |  |  | ক9 | ক10 | ক11 | ক12 | ক13   | ক14  |       |      |       |      |  |
| (সদস্য কোড)                                                                                                                                                   | ঐ সদস্যের রোগের কোড লিখুন* | আপনি/ঐ সদস্য ঐ অসুখ কতদিন ভুগেছিলেন? | আপনি/ঐ সদস্য কি ঐ অসুখের জন্য স্বাস্থ্যসেবা নিয়েছিলেন? কোড: 1. হ্যাঁ, 2. না (উত্তর যদি না হয় তবে শুধু ক5 অংশ প্রযোজ্য) | যদি চিকিৎসা না নিয়ে থাকেন, কি কারণে নেননি? | 1. জটিল কোনো সমস্যা ছিলনা<br>2. চিকিৎসার খরচ অত্যধিক<br>3. পর্যাপ্ত অর্থ ছিলনা<br>4. স্বাস্থ্যকেন্দ্রের দূরত্ব খুব বেশি<br>5. স্বাস্থ্যকেন্দ্রে নিয়ে যাওয়ার কেউ ছিল না<br>6. স্বাস্থ্যকেন্দ্রের অবস্থান জানেননা<br>7. অন্যান্য (উল্লেখ করুন.....) | আপনি কার কাছ থেকে চিকিৎসা নিয়েছিলেন?<br>1. মেডিকেল কলেজ হাসপাতাল<br>2. বিশেষায়িত হাসপাতাল<br>3. রেফার্ড জেলাসদর হাসপাতাল (এসএসকে)<br>4. অন্যান্য জেলাসদর হাসপাতাল<br>5. উপজেলা হেলথ কমপ্লেক্স<br>6. ইউনিয়ন সার্বসেটার/ কমিউনিটি ক্লিনিক/রুরাল ডিসপেন্সারী<br>7. মাতৃ ও শিশু সেবাকেন্দ্র<br>8. বেসরকারী ক্লিনিক/হাসপাতাল<br>9. এনজিও ক্লিনিক/হাসপাতাল<br>10. এনজিও স্বাস্থ্যকর্মী<br>11. সরকারি স্বাস্থ্য কর্মী<br>12. বেসরকারী চিকিৎসক (স্বীকৃত ডিগ্রী)<br>13. বেসরকারী চিকিৎসক (অনানুষ্ঠানিক ডিগ্রী)<br>14. কবিরাজ/হোমিওপ্যাথিক<br>15. নিজ চিকিৎসা<br>16. ঔষধের দোকান<br>17. অন্যান্য (উল্লেখ করুন) | 1. হ্যাঁ<br>2. না (না হলে ক9 এ যান) | যদি হ্যাঁ হয় তবে, কতদিন হাসপাতালে ভর্তি ছিলেন? (পুরুষ/মহিলা)<br>চিকিৎসা কি এসএসকে আওতাধীন 1. হ্যাঁ 2. না 99. প্রযোজ্য নয় | প্রদর্শন কি<br>ঔষধ<br>বিছানা<br>দরীয়া খরচ<br>যাতায়াত<br>বকশিশ<br>এজেন্ট<br>প্যাকেজ<br>অপারেশন<br>অন্যান্য | অসুস্থতা জটিল কারণে কতদিন কাজে অল্পপস্থিত ছিলেন (পুরুষ/মহিলা)<br>বিগত 3 মাসের মধ্যে অসুস্থতাসহ কতদিন কাজে উপস্থিত ছিলেন? (পূর্ণ দিবস) (সমস্যা না হলে "০০" লিখুন)<br>গত 3 মাসের মধ্যে অসুস্থতার কারণে স্থায়ীভাবে/ সাময়িক ভাবে কোনো কাজ ছেড়েছেন কি? 1. হ্যাঁ, 2. না 99. প্রযোজ্য নয়<br>গত 12 মাসের মধ্যে অসুস্থতার কারণে স্থায়ীভাবে ক্ষয় হারিয়েছেন কি? 1. হ্যাঁ, 2. না 99. প্রযোজ্য নয় | আপনি চিকিৎসার খরচ কিসে করেছিলেন?<br>1. নিয়মিত আয়<br>2. পরিবারের সঞ্চয়<br>3. এস.এস.কে<br>4. ঋণ<br>5. নিজস্ব জমিদারি বিক্রি<br>6. গাছ/কৃষিপণ্য/গৃহশালিতপ্রাপ্তবিক্রি<br>7. স্থায়ী সম্পত্তি বিক্রি<br>8. জমি বা সম্পত্তি বন্ধক<br>9. মহাজনের কাছ থেকে টাকা ধার<br>10. বন্ধু বা আত্মীয় স্বজনদের কাছ থেকে সাহায্য<br>11. আত্মীয়/বন্ধু/সহকর্মীদের কাছ থেকে ধার<br>12. কোন প্রতিষ্ঠান/সমিতি থেকে ঋণ গ্রহণ<br>13. অন্যান্য (নির্দিষ্ট করুন) |  |  |    |     |     |     |       |      |       |      |       |      |  |
|                                                                                                                                                               |                            |                                      |                                                                                                                          |                                             | ক্রমিক নং                                                                                                                                                                                                                                           | চিকিৎসার উৎস                                                                                                                                                                                                                                                                                                                                                                                                                                                                                                                                                                                            |                                     |                                                                                                                            |                                                                                                             |                                                                                                                                                                                                                                                                                                                                                                                              |                                                                                                                                                                                                                                                                                                                                                                                                                                           |  |  |    |     |     |     | উৎস-1 | টাকা | উৎস-2 | টাকা | উৎস-3 | টাকা |  |
|                                                                                                                                                               |                            |                                      |                                                                                                                          |                                             | 1.                                                                                                                                                                                                                                                  |                                                                                                                                                                                                                                                                                                                                                                                                                                                                                                                                                                                                         |                                     |                                                                                                                            |                                                                                                             |                                                                                                                                                                                                                                                                                                                                                                                              |                                                                                                                                                                                                                                                                                                                                                                                                                                           |  |  |    |     |     |     |       |      |       |      |       |      |  |
|                                                                                                                                                               |                            |                                      |                                                                                                                          |                                             | 2.                                                                                                                                                                                                                                                  |                                                                                                                                                                                                                                                                                                                                                                                                                                                                                                                                                                                                         |                                     |                                                                                                                            |                                                                                                             |                                                                                                                                                                                                                                                                                                                                                                                              |                                                                                                                                                                                                                                                                                                                                                                                                                                           |  |  |    |     |     |     |       |      |       |      |       |      |  |
|                                                                                                                                                               |                            |                                      |                                                                                                                          |                                             | 3.                                                                                                                                                                                                                                                  |                                                                                                                                                                                                                                                                                                                                                                                                                                                                                                                                                                                                         |                                     |                                                                                                                            |                                                                                                             |                                                                                                                                                                                                                                                                                                                                                                                              |                                                                                                                                                                                                                                                                                                                                                                                                                                           |  |  |    |     |     |     |       |      |       |      |       |      |  |
|                                                                                                                                                               |                            |                                      |                                                                                                                          |                                             | 1.                                                                                                                                                                                                                                                  |                                                                                                                                                                                                                                                                                                                                                                                                                                                                                                                                                                                                         |                                     |                                                                                                                            |                                                                                                             |                                                                                                                                                                                                                                                                                                                                                                                              |                                                                                                                                                                                                                                                                                                                                                                                                                                           |  |  |    |     |     |     |       |      |       |      |       |      |  |
|                                                                                                                                                               |                            |                                      |                                                                                                                          |                                             | 2.                                                                                                                                                                                                                                                  |                                                                                                                                                                                                                                                                                                                                                                                                                                                                                                                                                                                                         |                                     |                                                                                                                            |                                                                                                             |                                                                                                                                                                                                                                                                                                                                                                                              |                                                                                                                                                                                                                                                                                                                                                                                                                                           |  |  |    |     |     |     |       |      |       |      |       |      |  |
|                                                                                                                                                               |                            |                                      |                                                                                                                          |                                             | 3.                                                                                                                                                                                                                                                  |                                                                                                                                                                                                                                                                                                                                                                                                                                                                                                                                                                                                         |                                     |                                                                                                                            |                                                                                                             |                                                                                                                                                                                                                                                                                                                                                                                              |                                                                                                                                                                                                                                                                                                                                                                                                                                           |  |  |    |     |     |     |       |      |       |      |       |      |  |
|                                                                                                                                                               |                            |                                      |                                                                                                                          |                                             | 1.                                                                                                                                                                                                                                                  |                                                                                                                                                                                                                                                                                                                                                                                                                                                                                                                                                                                                         |                                     |                                                                                                                            |                                                                                                             |                                                                                                                                                                                                                                                                                                                                                                                              |                                                                                                                                                                                                                                                                                                                                                                                                                                           |  |  |    |     |     |     |       |      |       |      |       |      |  |
|                                                                                                                                                               |                            |                                      |                                                                                                                          |                                             | 2.                                                                                                                                                                                                                                                  |                                                                                                                                                                                                                                                                                                                                                                                                                                                                                                                                                                                                         |                                     |                                                                                                                            |                                                                                                             |                                                                                                                                                                                                                                                                                                                                                                                              |                                                                                                                                                                                                                                                                                                                                                                                                                                           |  |  |    |     |     |     |       |      |       |      |       |      |  |
|                                                                                                                                                               |                            |                                      |                                                                                                                          |                                             | 3.                                                                                                                                                                                                                                                  |                                                                                                                                                                                                                                                                                                                                                                                                                                                                                                                                                                                                         |                                     |                                                                                                                            |                                                                                                             |                                                                                                                                                                                                                                                                                                                                                                                              |                                                                                                                                                                                                                                                                                                                                                                                                                                           |  |  |    |     |     |     |       |      |       |      |       |      |  |

\*1=সর্দি কাশি, 2=স্বর, 3=টাইফয়েড, 4=ডায়ারিয়া/পাতলা পায়খানা/আমাশয়, 5=বমি, 6=হাঁপানি/শ্বাসকষ্ট, 7=ঘোট কাটাঁড়েঁড়া, 8=হাড়তাস 9=জন্ডিস, 10=দুর্বলতা, 11=কৃমি, 12=ব্যাথা, 13=চর্মরোগ, 14=খিঁচুনি, 15=বৃক্কশ্বালা, 16=উচ্চ রক্তচাপ, 17=ডায়াবেটিস, 18=যক্ষ্মা, 19=কুষ্ঠরোগ, 20=পক্ষাঘাত/প্যারালাইসিস, 21=বাত, 2=বাতশ্বর 23= ক্যান্সার, 24= সন্তান প্রসব, 25= গর্ভসংক্রান্ত সমস্যা 26= মাসিক সমস্যা, 27= অন্যান্য (নির্দিষ্ট করুন)

| Section 6: খাদ্য নিরাপত্তার উপর অসুস্থতার প্রভাব                              |                                                                                                                                                        |             |       |                  |
|-------------------------------------------------------------------------------|--------------------------------------------------------------------------------------------------------------------------------------------------------|-------------|-------|------------------|
| (যদি খানার কোনো সদস্য অসুস্থতায় না ভোগেন তবে পরবর্তী সেকশন থেকে প্রশ্ন করুন) |                                                                                                                                                        |             |       |                  |
| ক্রঃনং                                                                        | প্রশ্ন                                                                                                                                                 | উত্তরের ধরন |       |                  |
| 1                                                                             | গত 3 মাসের মধ্যে খানার কোনো সদস্যের অসুস্থতার খরচের জন্য আপনার পরিবারের খাদ্য গ্রহণের খরচ কমাতে হয়েছিল কি?                                            | 1. হ্যাঁ    | 2. না | 99. প্রযোজ্য নয় |
| 2                                                                             | গত 3 মাসের মধ্যে খানার কোনো সদস্যের অসুস্থতার খরচের জন্য আপনার পরিবারের খাদ্য বাদে অন্যান্য খরচ (যেমন: শিক্ষা, পোশাক, আসবাব ইত্যাদি) কমাতে হয়েছিল কি? | 1. হ্যাঁ    | 2. না | 99. প্রযোজ্য নয় |

### Section 7: স্বাস্থ্যসেবার ব্যয়ের প্রভাব ও এস.এস.কে সম্পর্কিত জিজ্ঞাসা

| ক্রঃনং (ক1) | প্রশ্ন (ক2)                                                                                        | উত্তরের ধরন (ক3)                                                                                                                                                                                                                                            |       |
|-------------|----------------------------------------------------------------------------------------------------|-------------------------------------------------------------------------------------------------------------------------------------------------------------------------------------------------------------------------------------------------------------|-------|
| 1           | আপনার কি মনে হয় যে বাংলাদেশের অনেকেই চিকিৎসার খরচ যোগাতে গিয়ে অর্থনৈতিক ভাবে ক্ষতির সম্মুখীন হন? | 1. হ্যাঁ                                                                                                                                                                                                                                                    | 2. না |
| 2           | আপনার কি মনে হয় যে আপনার আশে পাশের অনেকেই প্রতি মাসের কিছুদিন অসুস্থতা নিয়ে কাজ করেন?            | 1. হ্যাঁ                                                                                                                                                                                                                                                    | 2. না |
| 3           | কেউ অসুস্থ হলে অনেক প্রতিষ্ঠান তার সমগ্র চিকিৎসার ব্যয়বহন করে সে সম্পর্কে আপনি কি জানেন?          | 1. হ্যাঁ                                                                                                                                                                                                                                                    | 2. না |
| 4           | আপনি কি জীবন বীমা/লাইফ ইনস্যুরেন্স সম্পর্কে শুনেছেন?                                               | 1. হ্যাঁ                                                                                                                                                                                                                                                    | 2. না |
| 5           | আপনি কি স্বাস্থ্য বীমা/হেলথ ইনস্যুরেন্স সম্পর্কে শুনেছেন?                                          | 1. হ্যাঁ                                                                                                                                                                                                                                                    | 2. না |
| 6           | আপনি কি জানেন এই এলাকায় গরীব লোকদের স্বাস্থ্য সুরক্ষার জন্য কমসুটী/এসএসকে চালু আছে?               | 1. হ্যাঁ                                                                                                                                                                                                                                                    | 2. না |
| 7           | এস.এস.কে সেবা কেন্দ্র থেকে কিভাবে সেবা দেওয়া হয় তা কি আপনি কি জানেন?                             | 1. কার্ডের মাধ্যমে<br>2. টাকার বিনিময়ে<br>3. জানিনা                                                                                                                                                                                                        |       |
| 8           | আপনি কি জানেন এস.এস.কে সেবা কেন্দ্র থেকে কতটি রোগের সেবা দেওয়া হয়?                               | 1. হ্যাঁ<br>(হ্যাঁ হলে জানতে চান কতটি) _____ টি                                                                                                                                                                                                             | 2. না |
| 9           | এস.এস.কে থেকে চিকিৎসার জন্য কি ধরনের খরচ বহন করা হয়?<br>(একাধিক উত্তর হতে পারে)                   | 1. বিনামূল্যে ঔষধ<br>2. বিনামূল্যে পরীক্ষা/ডায়াগনস্টিক<br>3. রেফারেল সুবিধা<br>4. জেলা হাসপাতালে পাঠালে তার খরচ                                                                                                                                            |       |
| 10          | এস.এস.কে সম্পর্কে আপনি কোল মাধ্যম থেকে জেনেছেন?<br>(একাধিক উত্তর হতে পারে)                         | 1. এলাকার অন্যের কাছে<br>2. এস.এস.কে এর প্রতিনিধির কাছে<br>3. পরিচিত জনের কাছে<br>4. এলাকার জনপ্রতিনিধির কাছে<br>5. মাইকিং এর মাধ্যমে<br>6. পোস্টার থেকে<br>7. বিলবোর্ড থেকে<br>8. টিভি স্ক্রল বিজ্ঞাপন থেকে<br>9. ভিডিও দেখে<br>10. অন্যান্য (উল্লেখ করুন) |       |

### Part 7A: এস.এস.কে সেবা গ্রহণ সংক্রান্ত তথ্য (এসএসকে মেম্বারদের জন্য)

|    |                                                              |                                    |                            |  |
|----|--------------------------------------------------------------|------------------------------------|----------------------------|--|
| 11 | এস.এস.কে কার্ড নম্বর: (কার্ড দেখে পূরণ করুন)                 | _____                              |                            |  |
| 12 | কার্ড গ্রহণের তারিখ                                          | _____:_____:_____(দিন / মাস / বছর) |                            |  |
| 13 | কার্ড যে ব্যক্তির নামে তার সদস্য কোড লিখুন (Section 2 থেকে)  | _____ সদস্য কোড                    |                            |  |
| 14 | কখনও কি এস.এস.কে কার্ড ব্যবহার করেছিলেন? না করলে কেন করেননি? | 1. হ্যাঁ                           | 2. না (পরবর্তী সেকশনে যান) |  |
| 15 | কতবার ব্যবহার করেছিলেন?                                      | _____ বার                          |                            |  |

### Section 8: খানা সদস্যদের বর্তমান স্বাস্থ্যের অবস্থা সংক্রান্ত প্রশ্ন

(নিচের প্রতিটি গ্রুপে ভিনটি করে বক্স আছে, যেকোনো একটি বক্সে টিক চিহ্ন দিন। সেই বক্সটিতেই টিক চিহ্ন দিবেন যেটি আপনার শারীরিক অবস্থা সঠিকভাবে নির্দেশ করে। )

| সদস্য কোড: |                                                                                                                                                                                                                           |                                                                                                                                                                                                                                                                                                                                                                 |  |  |  |  |  |  |  |  |  |  |  |  |
|------------|---------------------------------------------------------------------------------------------------------------------------------------------------------------------------------------------------------------------------|-----------------------------------------------------------------------------------------------------------------------------------------------------------------------------------------------------------------------------------------------------------------------------------------------------------------------------------------------------------------|--|--|--|--|--|--|--|--|--|--|--|--|
| A          | <b>হাঁটা চলা</b><br>1. হাঁটা চলায় আমার কোনো অসুবিধা হয়না<br>2. হাঁটা চলায় আমার কিছুটা অসুবিধা হয়<br>3. বিছানা থেকে উঠতে পারিনা                                                                                        |                                                                                                                                                                                                                                                                                                                                                                 |  |  |  |  |  |  |  |  |  |  |  |  |
| B          | <b>নিজের যত্ন নিজে নেয়া</b><br>1. নিজের যত্ন নিতে আমার কোন অসুবিধা হয়না<br>2. নিজে গোসল করতে বা কাপড় পরতে আমার কিছুটা অসুবিধা হয়<br>3. নিজে গোসল করতে বা কাপড় পরতে পারিনা                                            |                                                                                                                                                                                                                                                                                                                                                                 |  |  |  |  |  |  |  |  |  |  |  |  |
| C          | <b>সাধারণ কাজকর্মঃ যেমন টুকিটাকি কাজ, পড়াশুনা, বাড়িঘরের কাজ, অবসরের কাজ ইত্যাদি</b><br>1. সাধারণ কাজকর্ম করতে আমার কোন অসুবিধা হয়না<br>2. সাধারণ কাজকর্ম করতে আমার কিছুটা অসুবিধা হয়<br>3. সাধারণ কাজকর্ম করতে পারিনা |                                                                                                                                                                                                                                                                                                                                                                 |  |  |  |  |  |  |  |  |  |  |  |  |
| D          | <b>গায়ে ব্যথা/ গায়ে খারাপ লাগা</b><br>1. সাধারণ কাজকর্ম করতে আমার কোন অসুবিধা হয়না<br>2. সাধারণ কাজকর্ম করতে আমার কিছুটা অসুবিধা হয়<br>3. সাধারণ কাজকর্ম করতে পারিনা                                                  |                                                                                                                                                                                                                                                                                                                                                                 |  |  |  |  |  |  |  |  |  |  |  |  |
| E          | <b>দুশ্চিন্তা/মনমরা ভাব</b><br>1. আমার দুশ্চিন্তা বা মনমরা ভাব নেই<br>2. আমার কিছুটা দুশ্চিন্তা বা মনমরা ভাব আছে<br>3. আমার খুব দুশ্চিন্তা হচ্ছে বা আমি খুব মনমরা আছি                                                     |                                                                                                                                                                                                                                                                                                                                                                 |  |  |  |  |  |  |  |  |  |  |  |  |
| F          | <b>আজ আপনার শরীরের অবস্থা স্কেলে চিহ্নিত করুন</b><br>                                                                                  | শরীরের ভাল না খারাপ অবস্থা আছে তা বুঝানোর জন্য নিম্নে একটি স্কেল আছে। শরীর পুরোপুরি ভালো হলে এই স্কেলে 100 তে দাগ দিয়ে বুঝাতে হবে এবং একেবারেই খারাপ হলে 0 তে দাগ দিয়ে বুঝাতে হবে।<br><br>আপনার মতে আজ আপনার শরীর কতটা ভাল বা খারাপ তা নিম্নের স্কেল দিয়ে বুঝান। স্কেলের যে পয়েন্টটা আপনার শরীরের আজকের অবস্থার সঙ্গে মিলে, সেই পয়েন্টটিতে ক্রস চিহ্ন দিন। |  |  |  |  |  |  |  |  |  |  |  |  |

আপনাকে অনেক ধন্যবাদ
